# Supplementary material
Source: PubMed Central journal article supplement (PMC3377374)

# Supporting Information

## Substrate-dependent Divergent Outcome from Catalytic Reactions of Silyl-protected Enoldiazoacetates With Nitrile Oxides: Azabicyclo[3.1.0]hexanes or 5-Arylamino-furan-2(3H)-ones

Xinfang Xu, Dmitry Shabashov, Peter J. Zavalij, Michael P. Doyle\*

*Department of Chemistry and Biochemistry, University of Maryland, College Park, Maryland  
20742*

*E-mail: [mdoyle3@umd.edu](mailto:mdoyle3@umd.edu)*

### Table of Contents

|                                                           |        |
|-----------------------------------------------------------|--------|
| Crystallographic data for compound 4g .....               | S2     |
| Spectra copies of the reaction mixture and compounds..... | S3-S23 |

### Crystallographic data for compound 4g

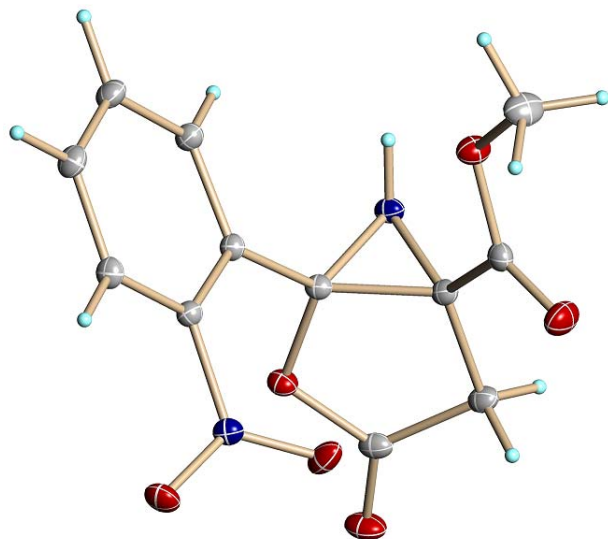

A clear colourless prism-like specimen of  $C_{12}H_{10}N_2O_6$ , approximate dimensions  $0.10\text{ mm} \times 0.28\text{ mm} \times 0.50\text{ mm}$ , was used for the X-ray crystallographic analysis. The X-ray intensity data were measured on a Bruker Smart Apex2, CCD system equipped with a graphite monochromator and a  $MoK\alpha$  fine focus sealed tube ( $\lambda = 0.71073\text{ \AA}$ ). Data collection temperature was 150 K.

The total exposure time was 12.63 hours. The frames were integrated with the Bruker SAINT software package using a narrow-frame algorithm. The integration of the data using a monoclinic unit cell yielded a total of 17592 reflections to a maximum  $\theta$  angle of  $30.00^\circ$  ( $0.71\text{ \AA}$  resolution), of which 3452 were independent (average redundancy 5.096, completeness = 100.0%,  $R_{\text{int}} = 1.93\%$ ,  $R_{\text{sig}} = 1.48\%$ ) and 3196 (92.58%) were greater than  $2\sigma(F^2)$ . The final cell constants of  $a = 6.8882(5)\text{ \AA}$ ,  $b = 20.8439(15)\text{ \AA}$ ,  $c = 8.2554(6)\text{ \AA}$ ,  $\beta = 90.0280(10)^\circ$ ,  $V = 1185.29(15)\text{ \AA}^3$ , are based upon the refinement of the XYZ-centroids of 9934 reflections above  $20\sigma(I)$  with  $4.934^\circ < 2\theta < 62.18^\circ$ . Data were corrected for absorption effects using the multi-scan method (SADABS). The calculated minimum and maximum transmission coefficients (based on crystal size) are 0.9440 and 0.9880.

The structure was solved and refined using the Bruker SHELXTL Software Package, using the space group  $P\ 1\ 21/c\ 1$ , with  $Z = 4$  for the formula unit,  $C_{12}H_{10}N_2O_6$ . The final anisotropic full-matrix least-squares refinement on  $F^2$  with 221 variables converged at  $R_1 = 3.50\%$ , for the observed data and  $wR_2 = 7.14\%$  for all data. The goodness-of-fit was 1.000. The largest peak in the final difference electron density synthesis was  $0.455\text{ e}^-/\text{\AA}^3$  and the largest hole was  $-0.228\text{ e}^-/\text{\AA}^3$  with an RMS deviation of  $0.045\text{ e}^-/\text{\AA}^3$ . On the basis of the final model, the calculated density was  $1.559\text{ g/cm}^3$  and  $F(000)$ ,  $576\text{ e}^-$

# <sup>1</sup>H NMR spectra comparison of 4g with the reaction mixture (pre-4g)

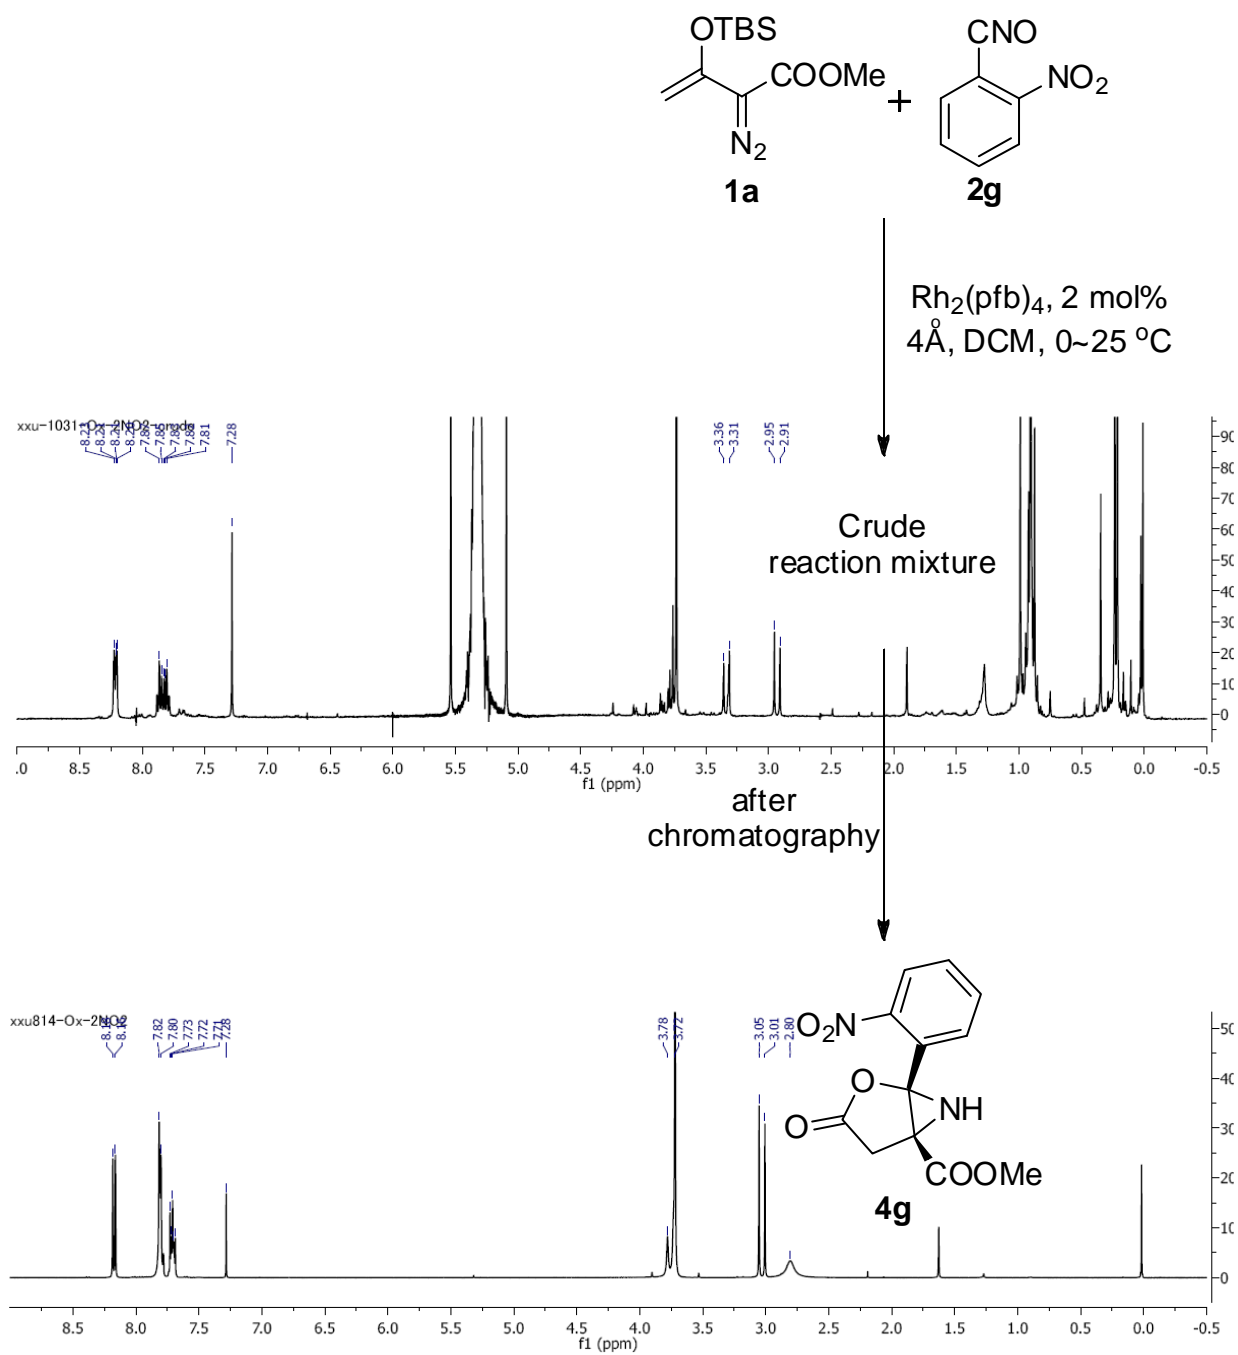

# NMR spectra of reaction mixture with TIPS-enoldiazoacetate

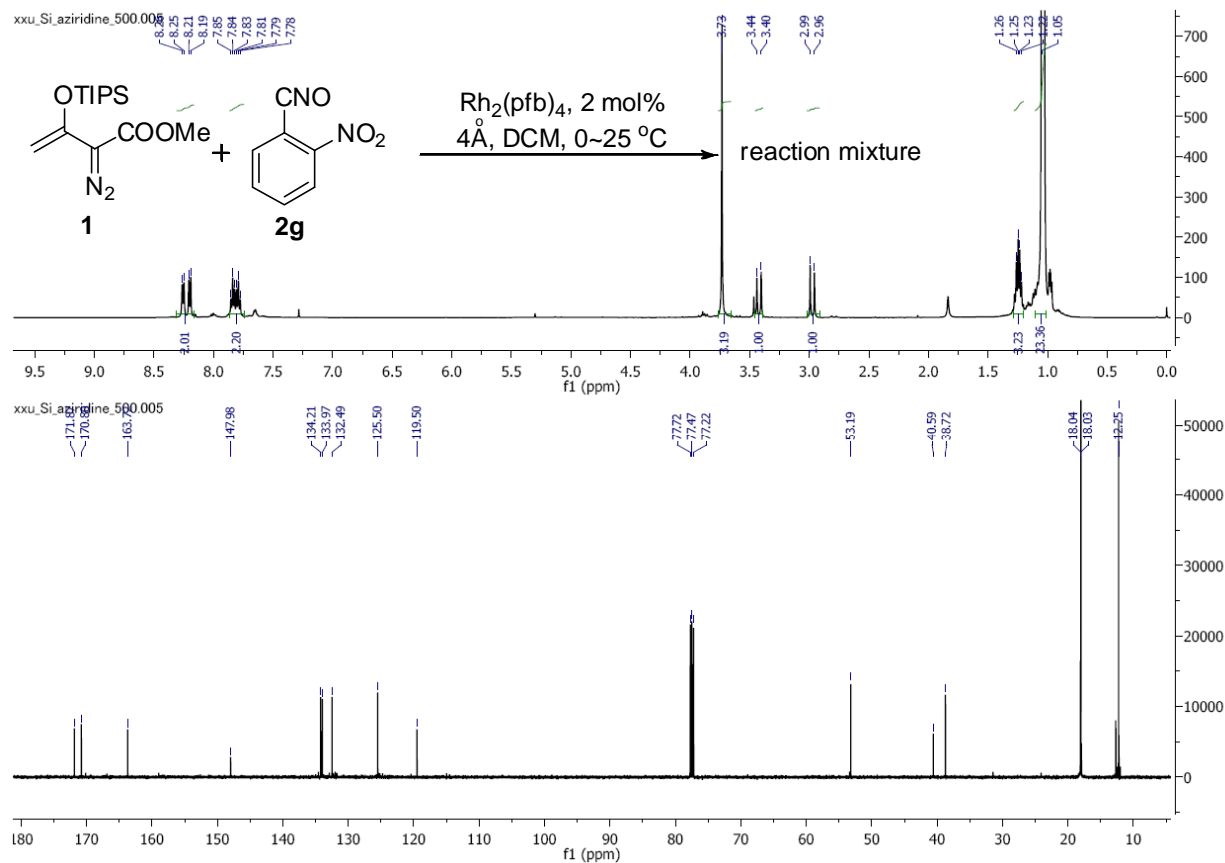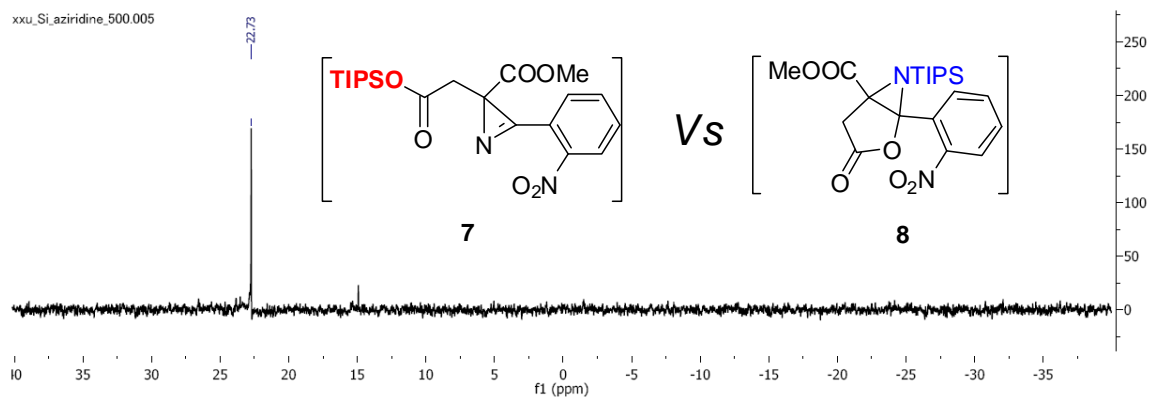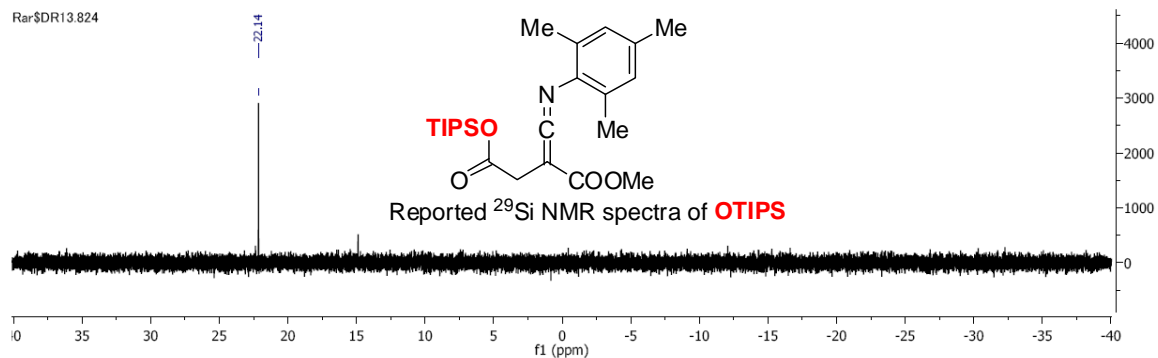

## 1D-Noe spectra of *trans*-4m and *cis*-4m

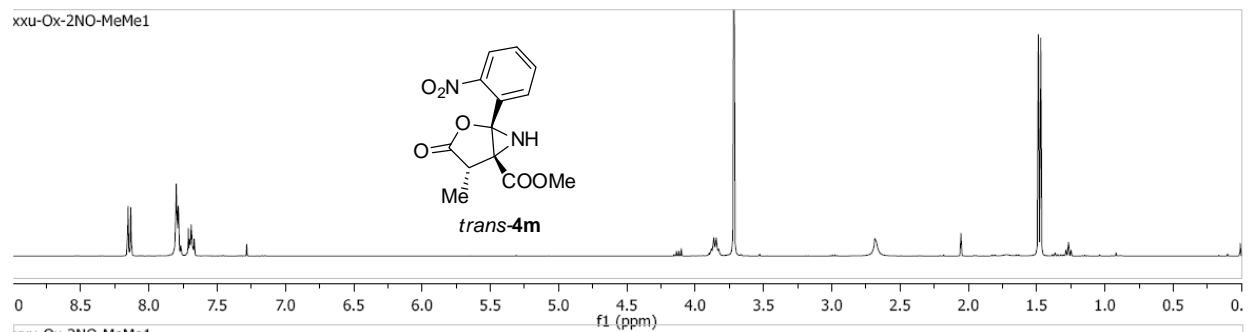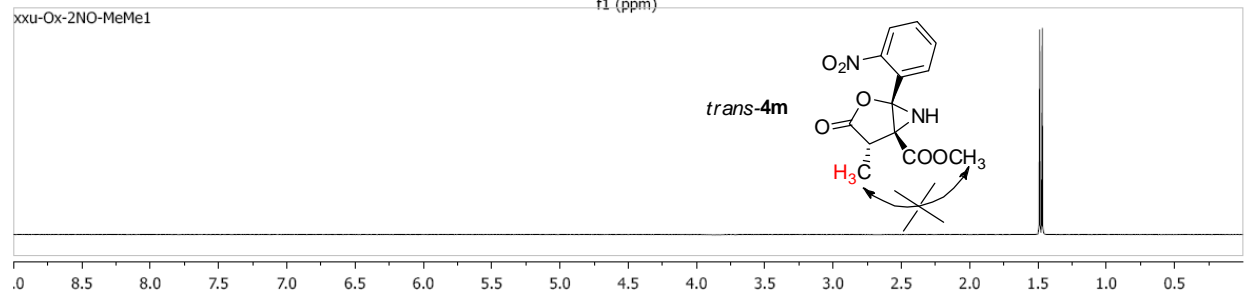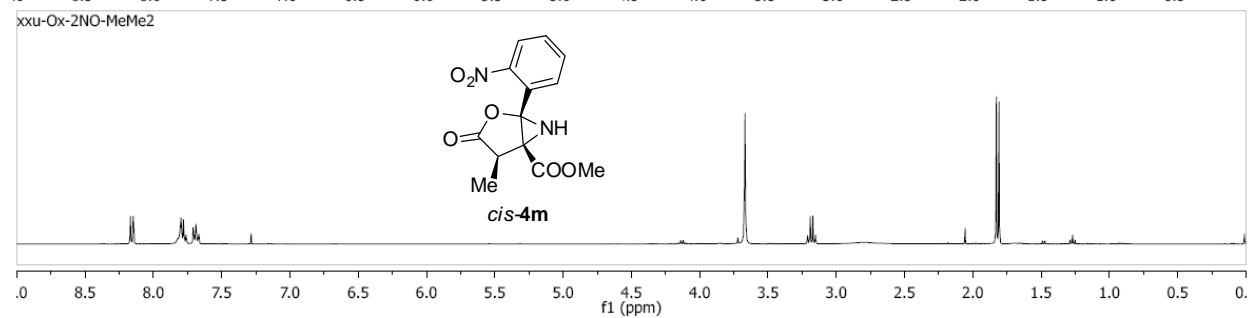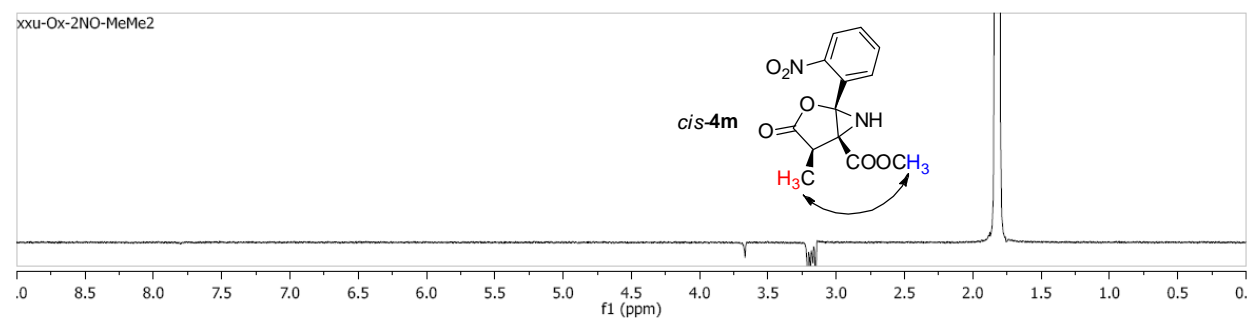

# 1D-Noe spectra of *trans-4o*

xxu-Ox-2NO-PhMe

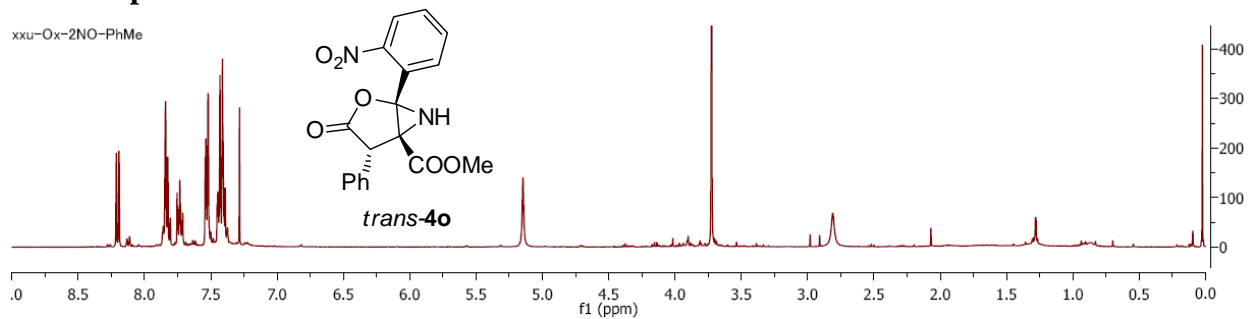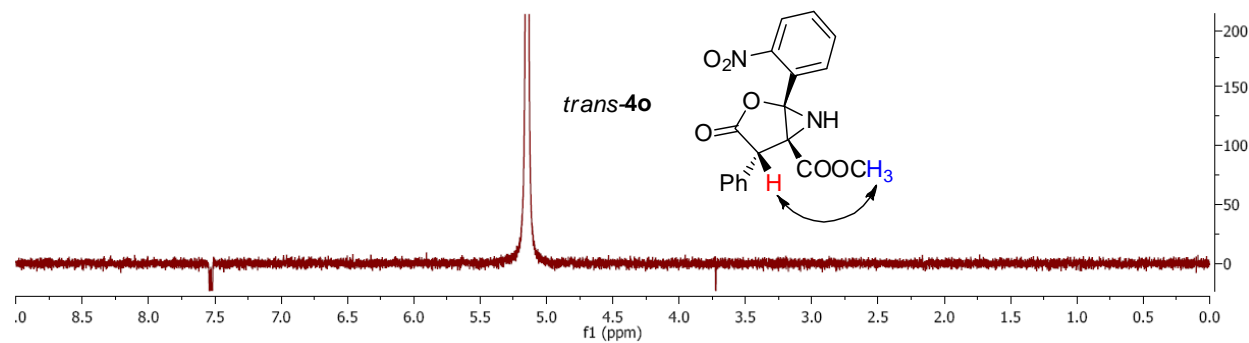

xxu-803-Ox-Me-Rh-P  
xxu803-Ox-Me-Rh-P

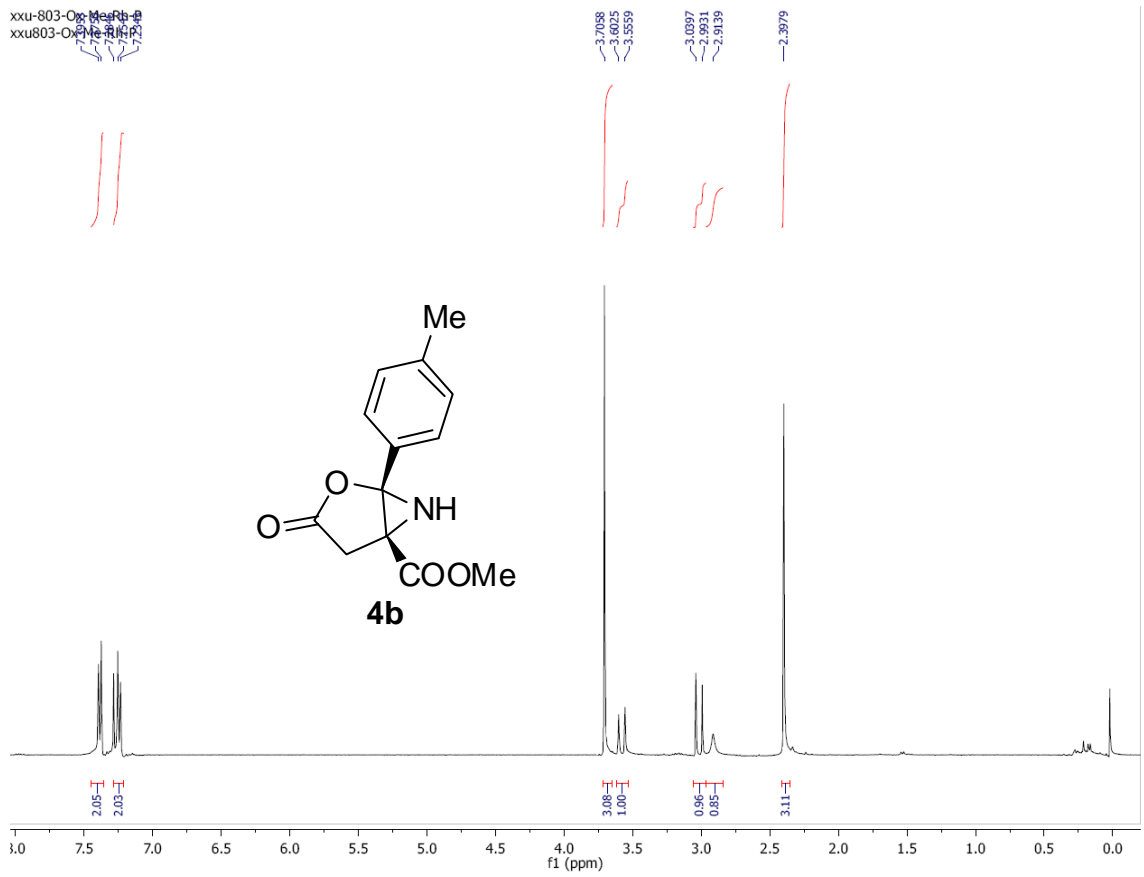

44-xxu-0803-Ox-Me-Rh-P  
User Name xxu  
Group doyle1  
Sample Label Ox-Me-Rh-P

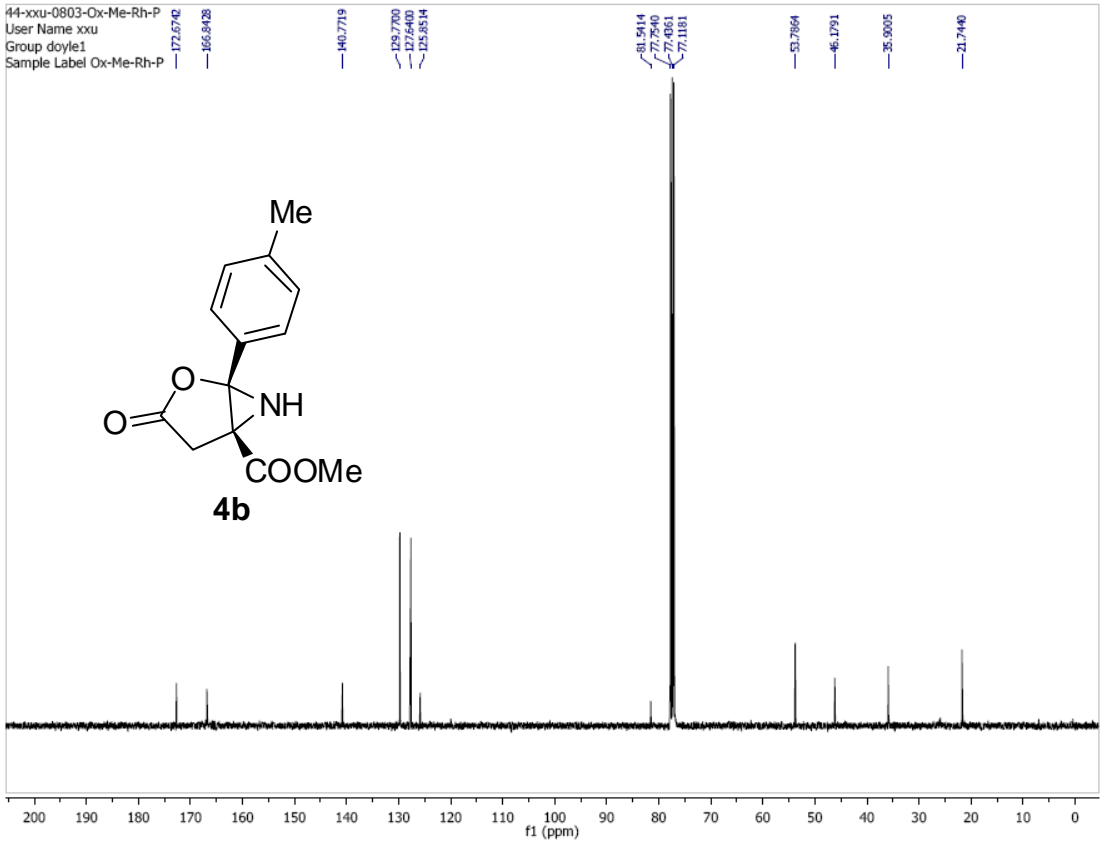

4-xxu-0204-Ox-4F2  
User Name xxu  
Group doyle1  
Sample Label Ox-4F2

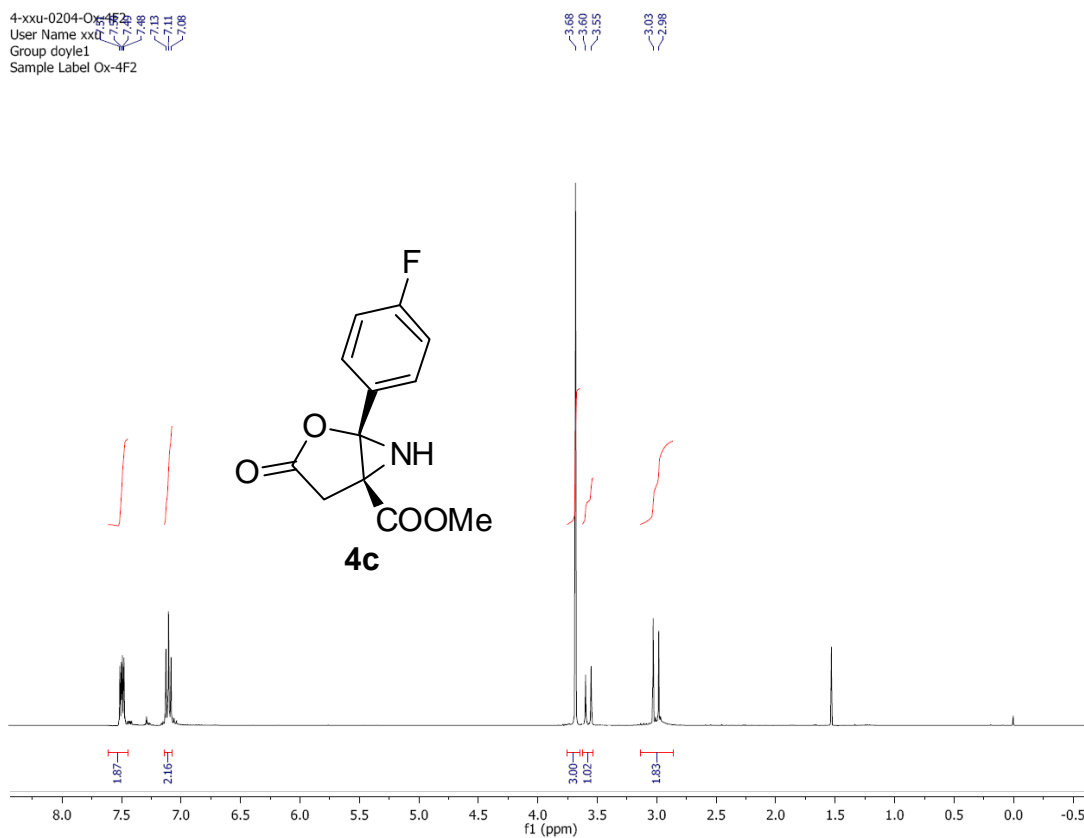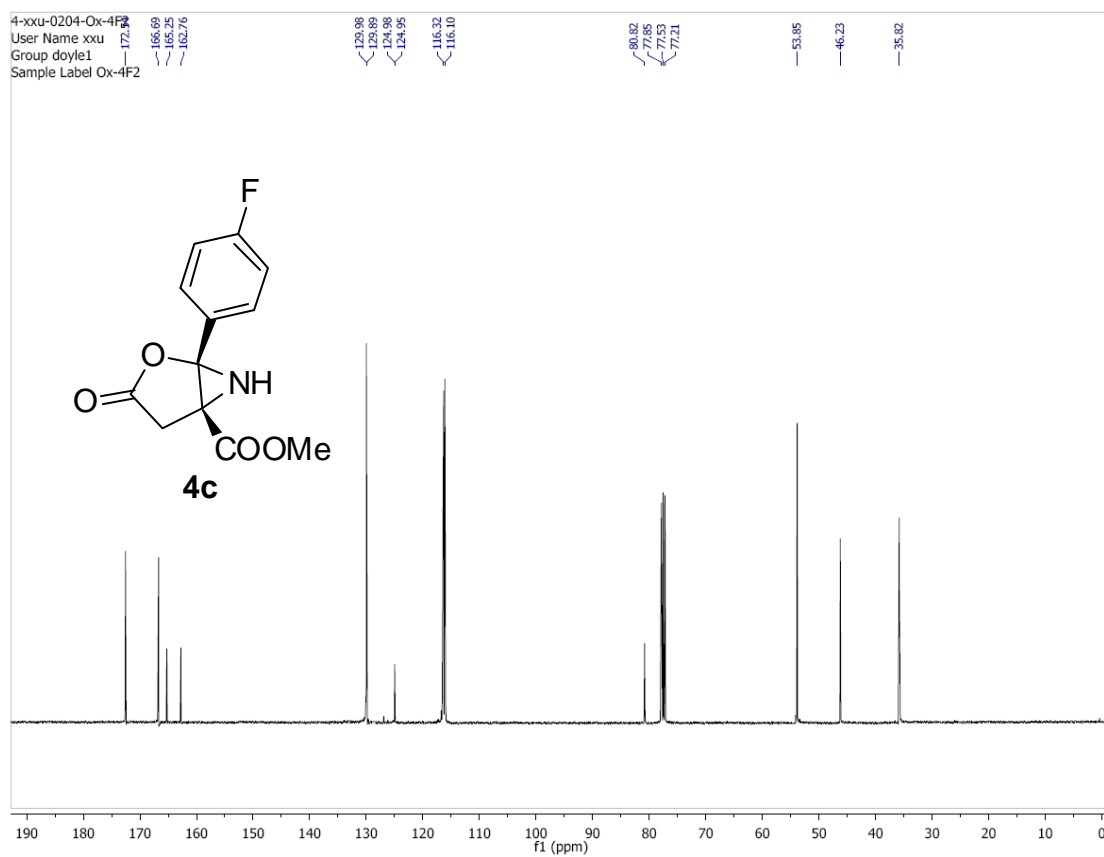



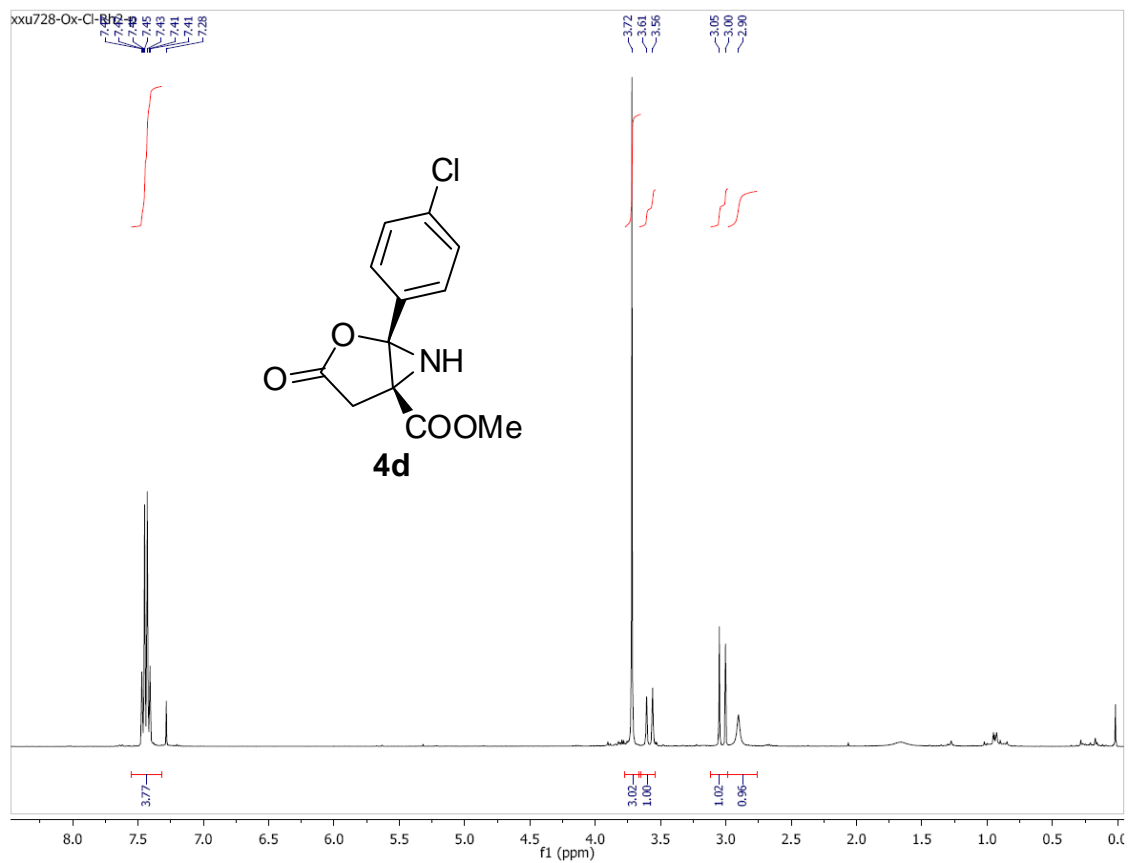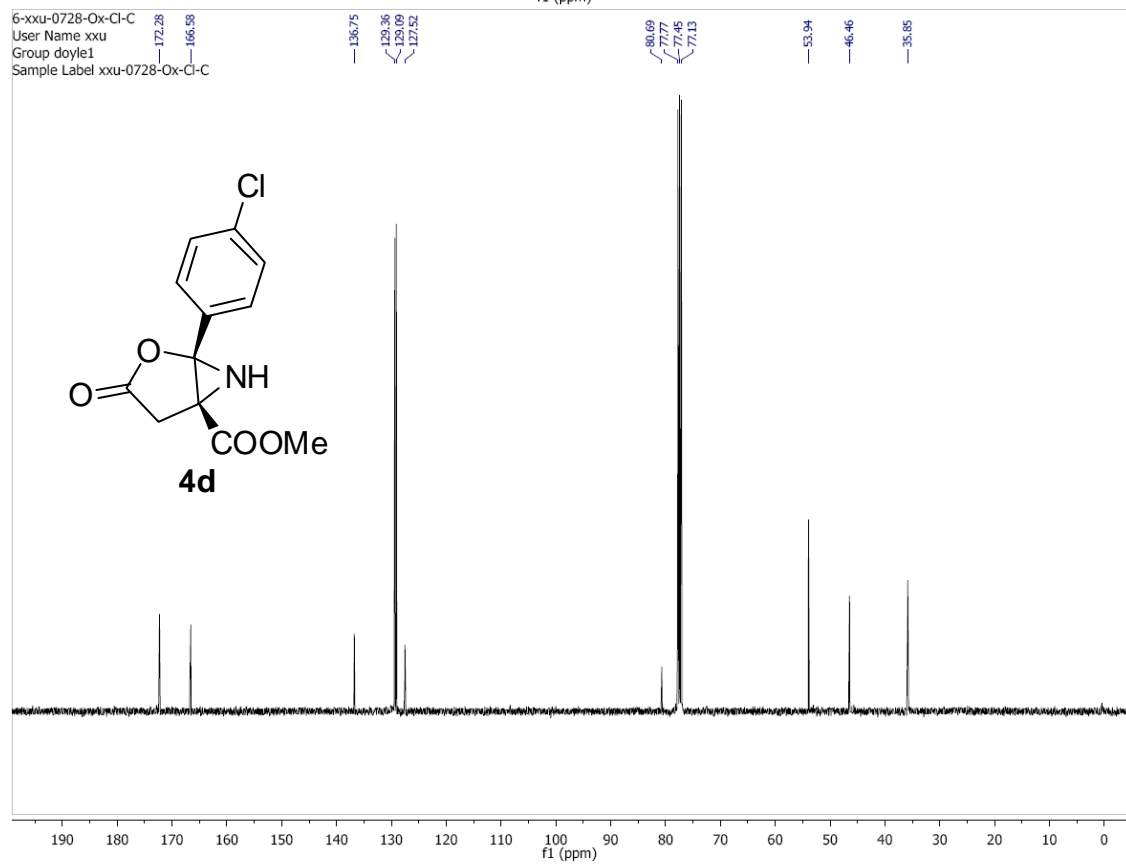

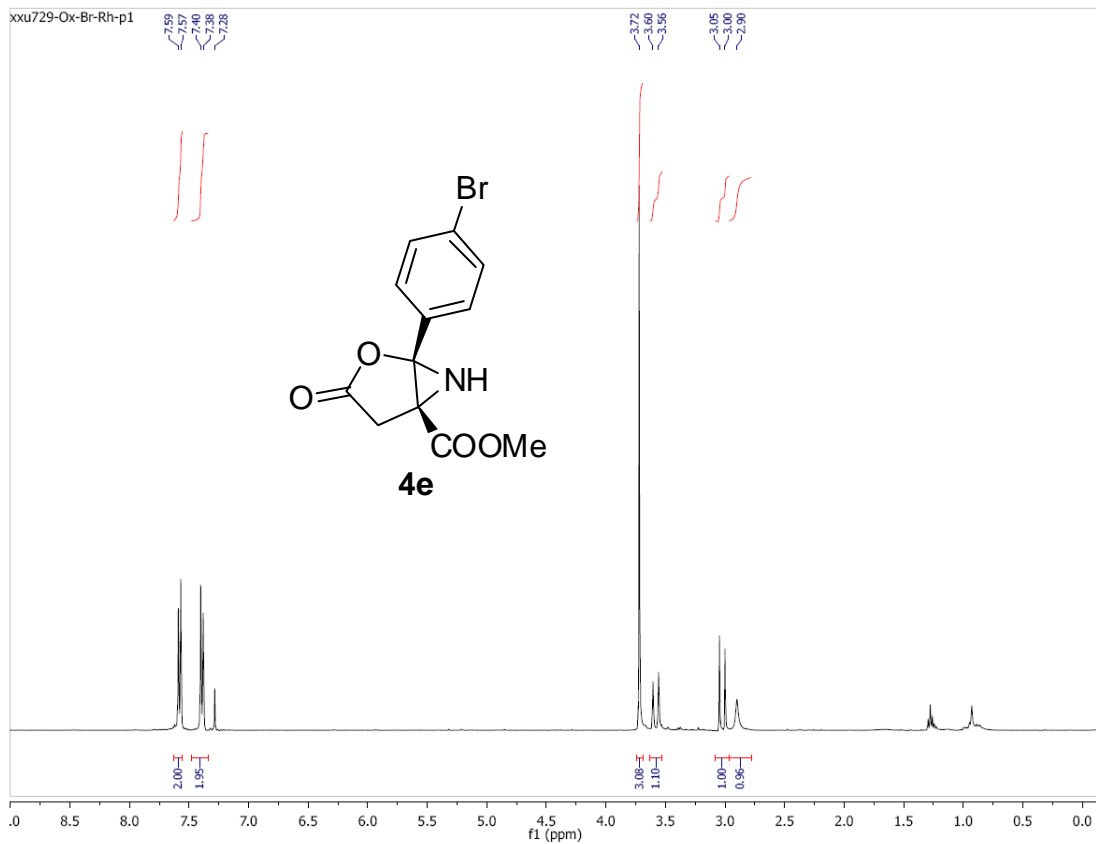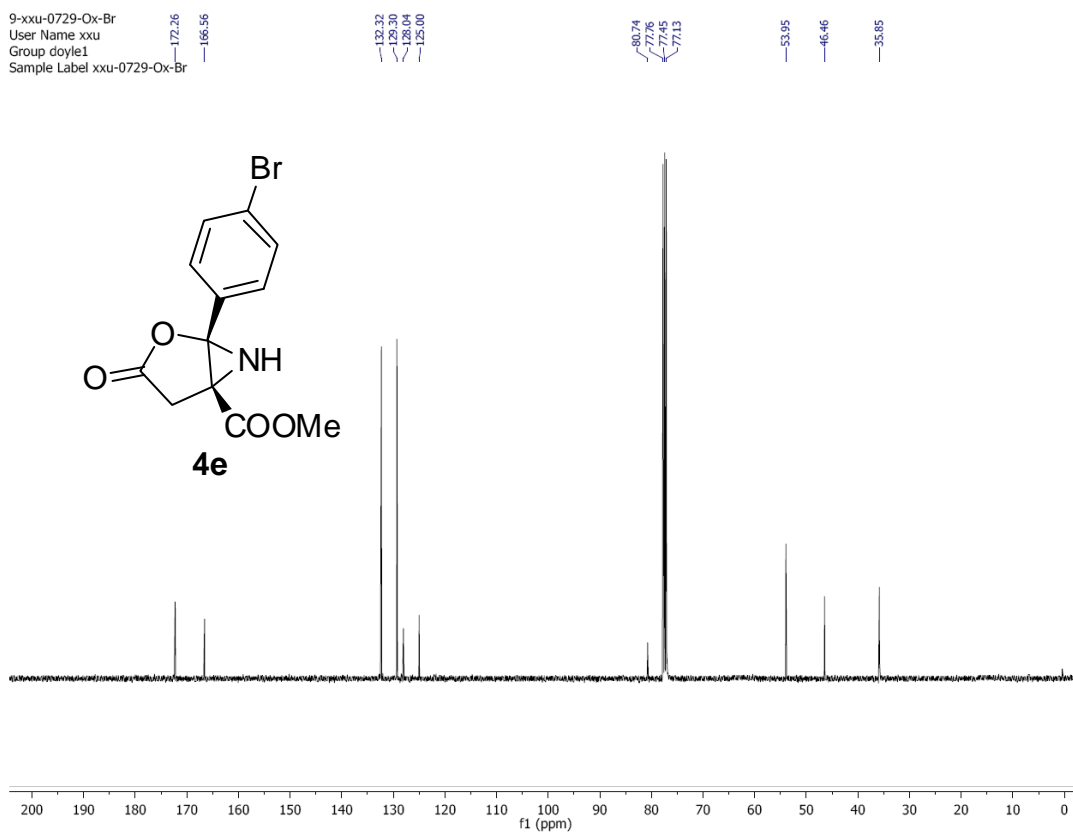

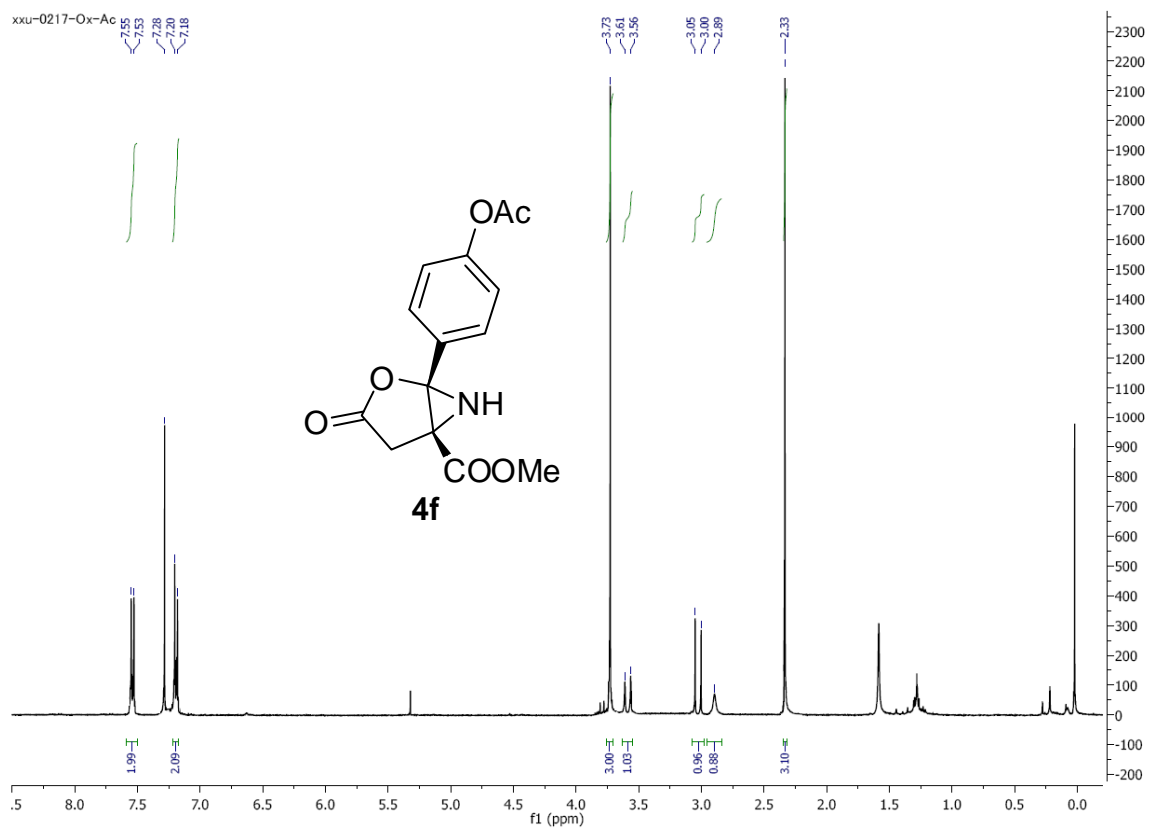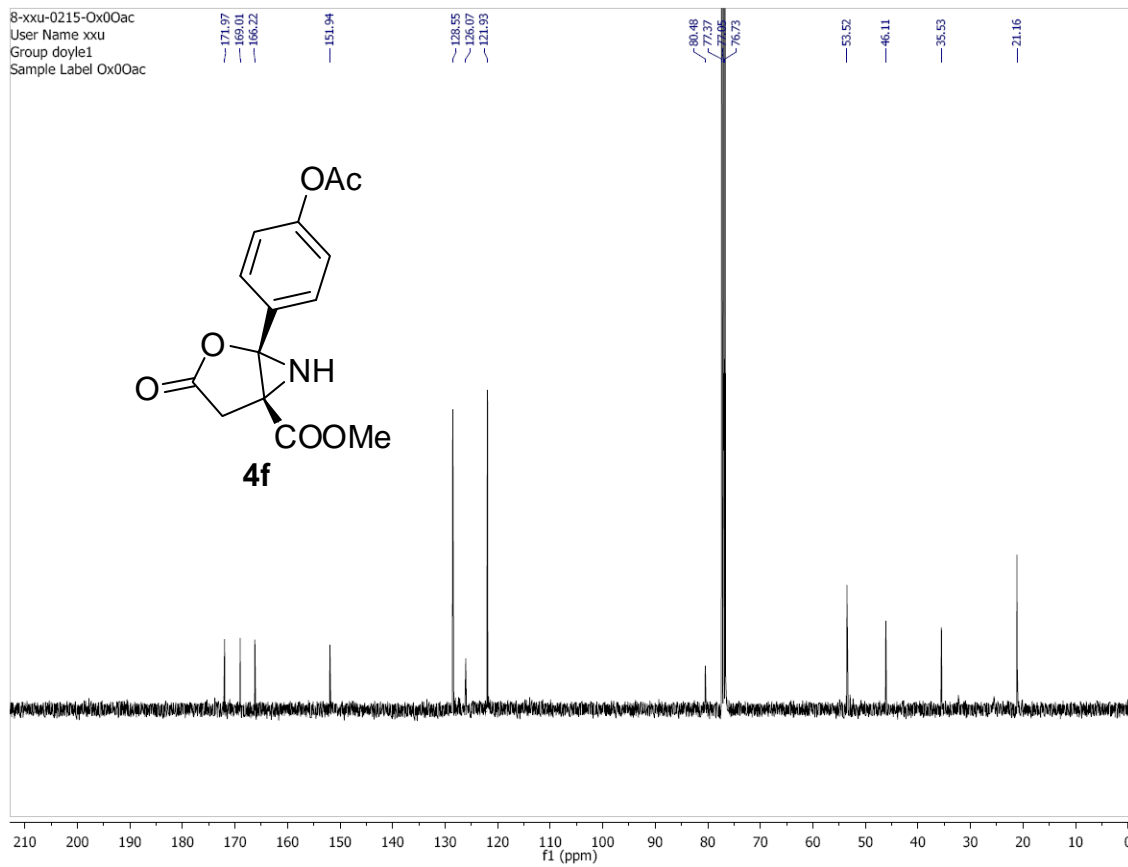

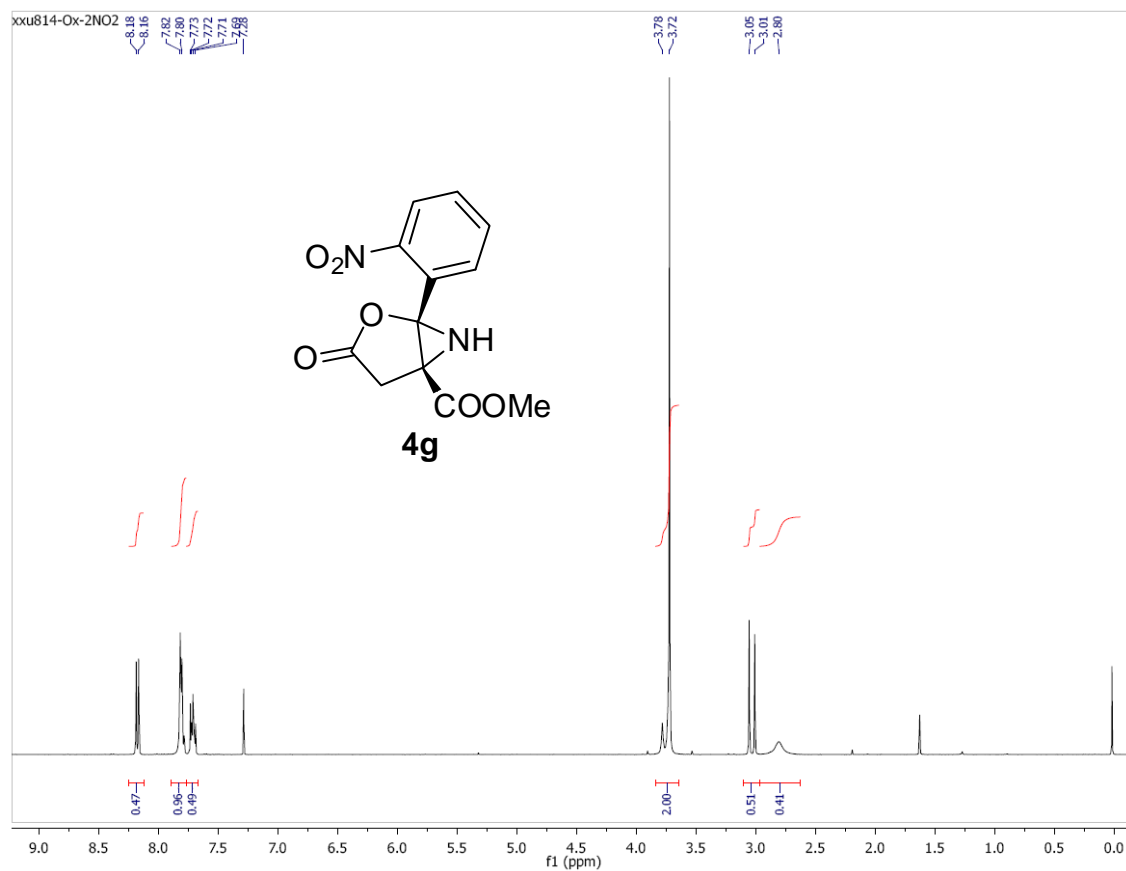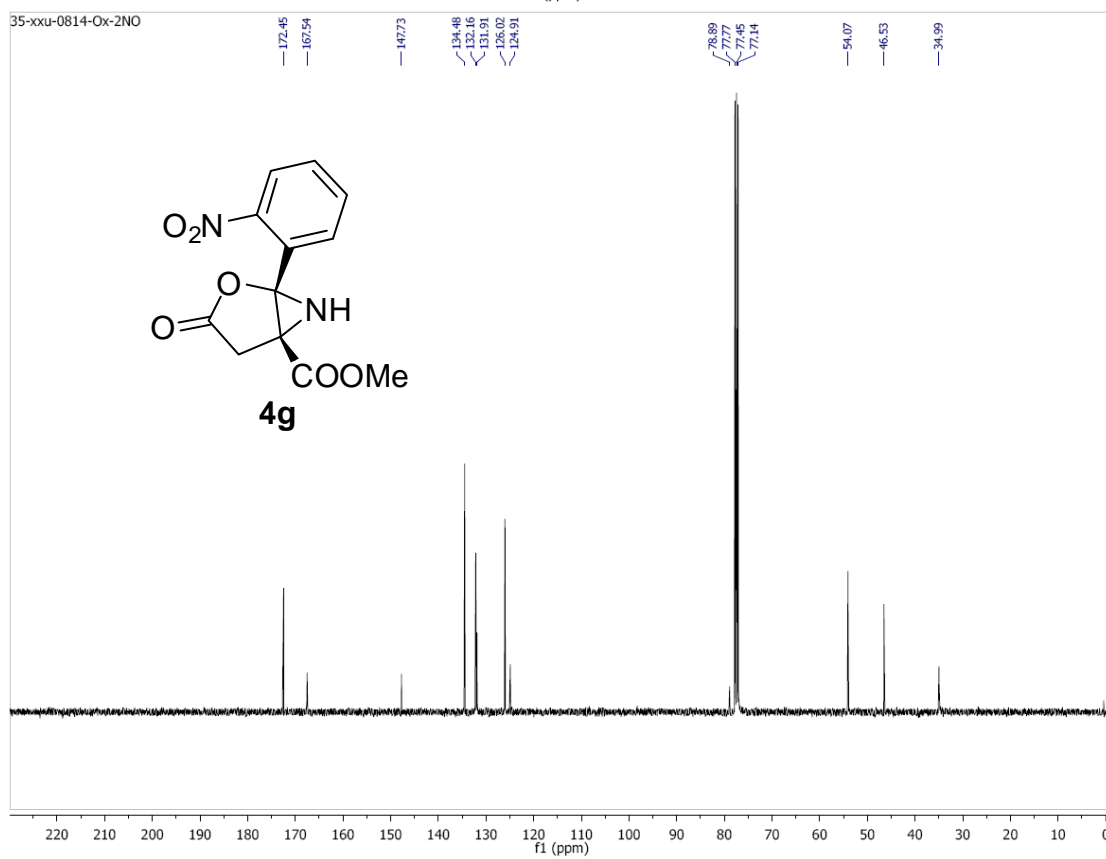

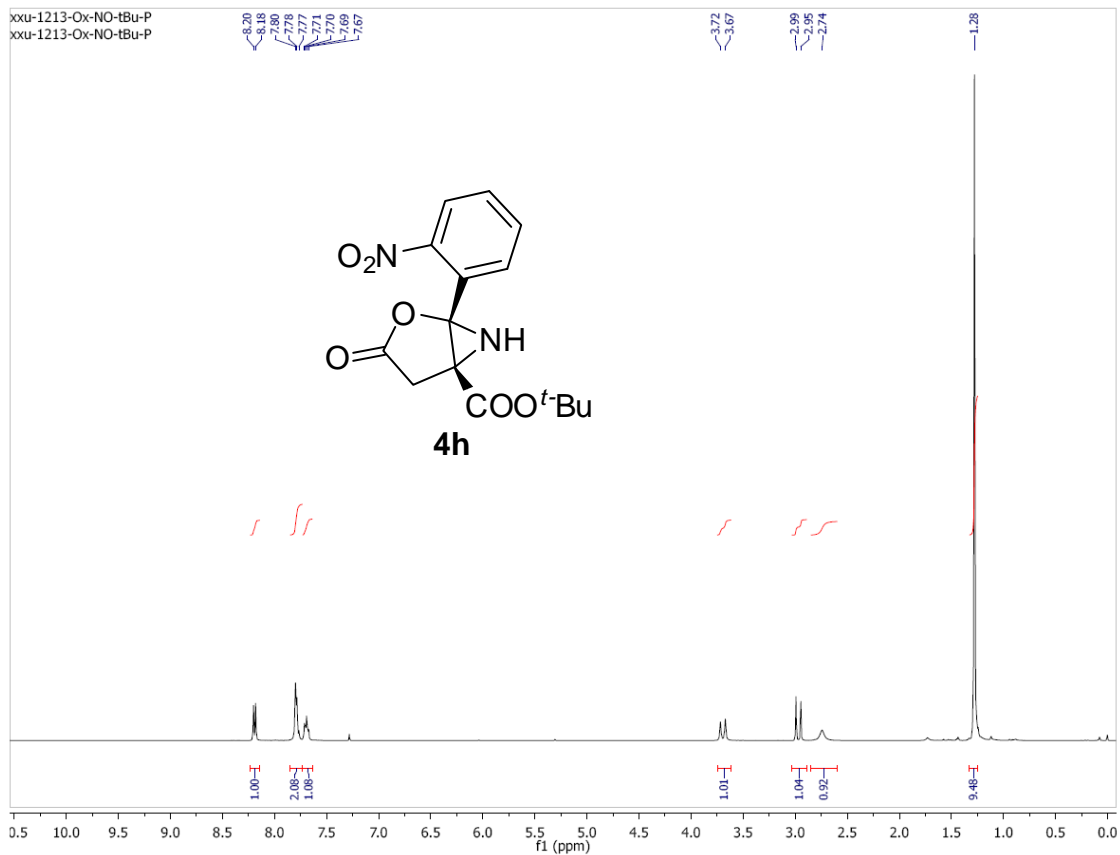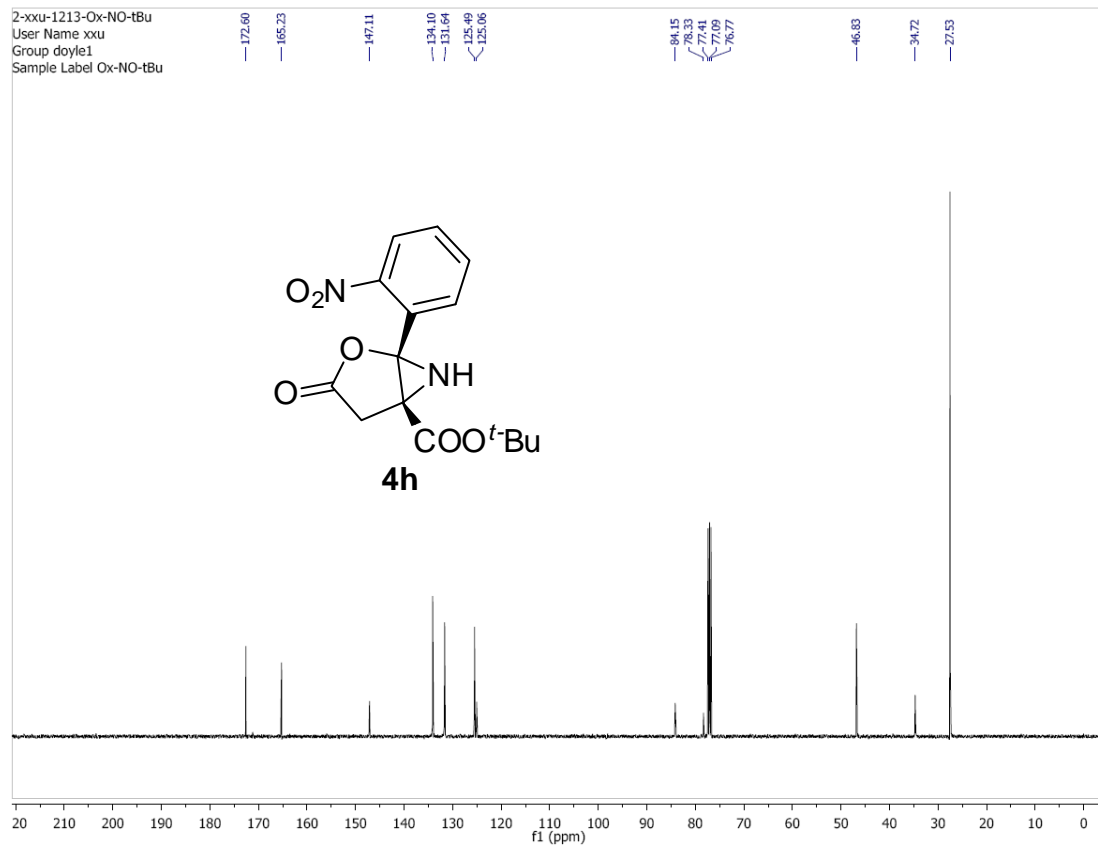

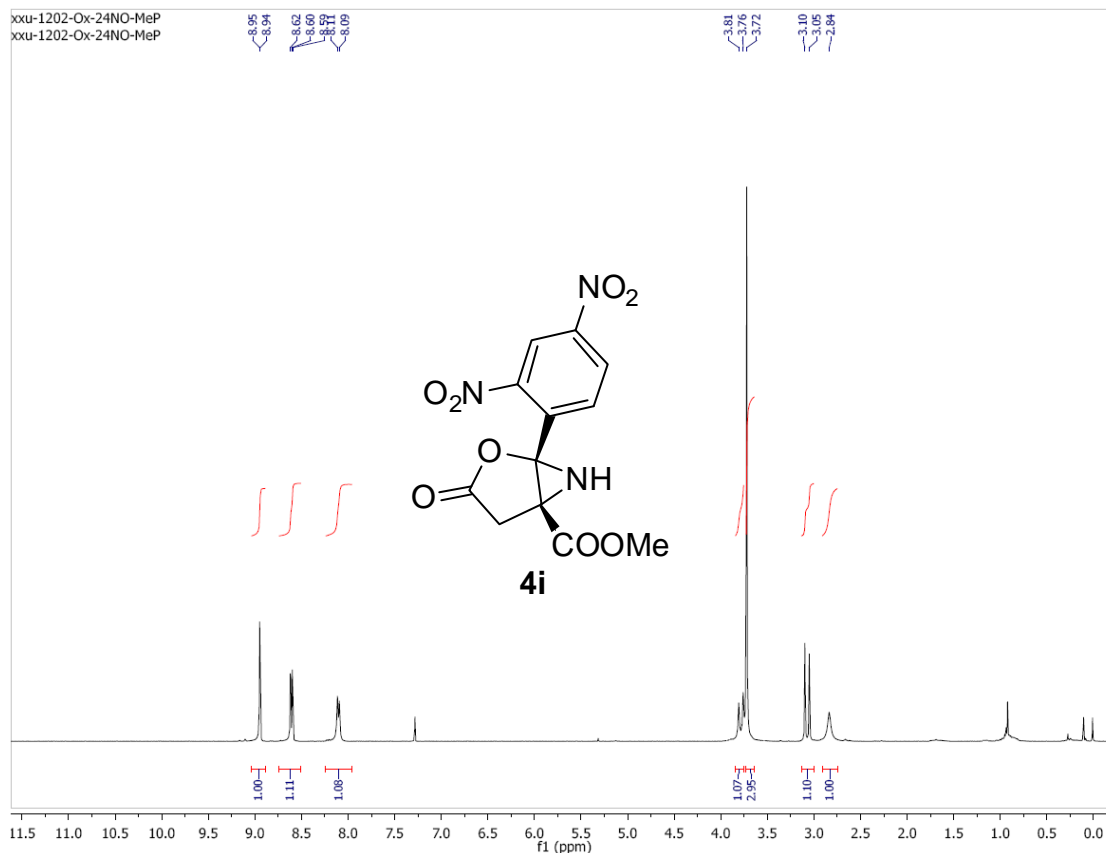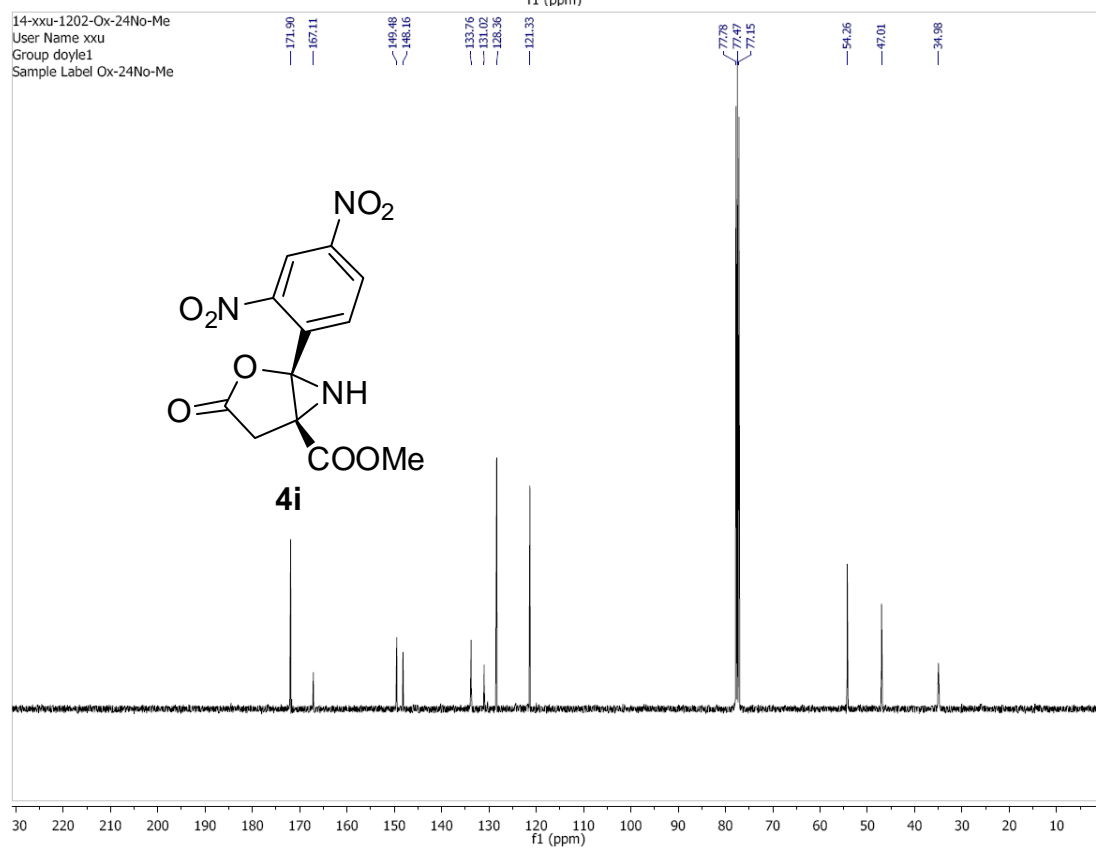

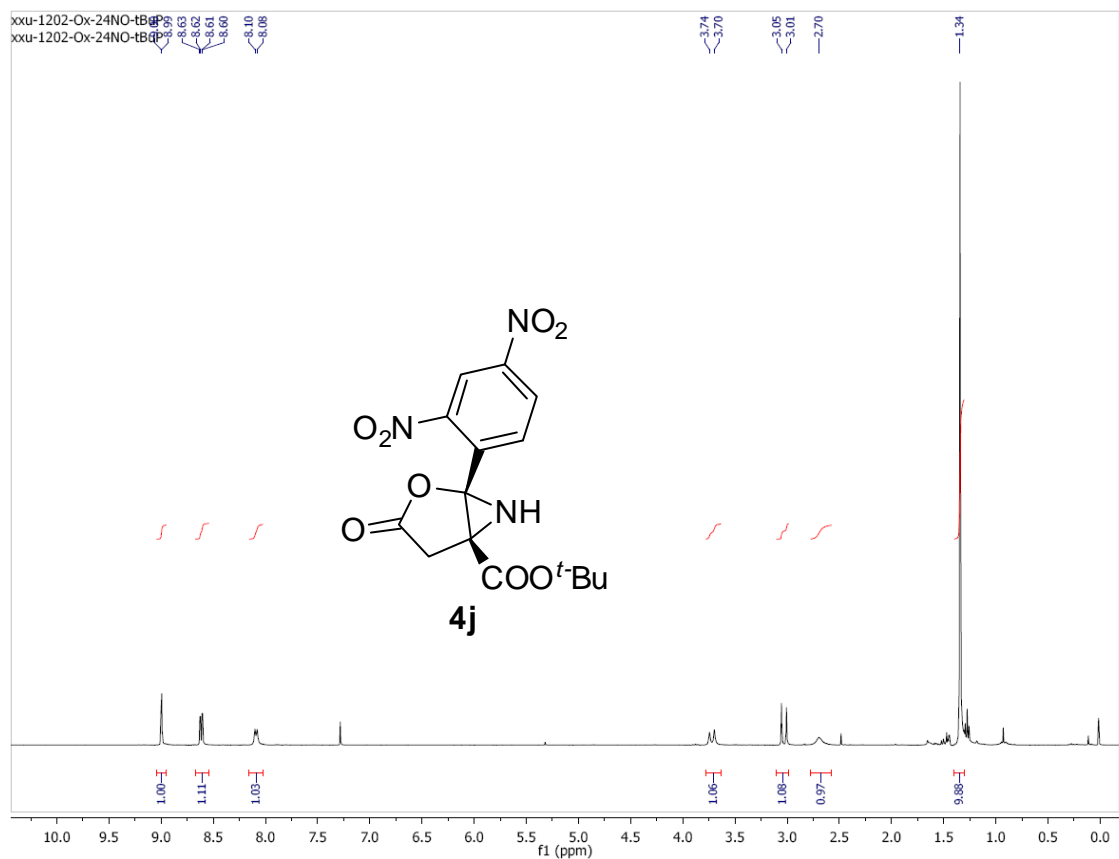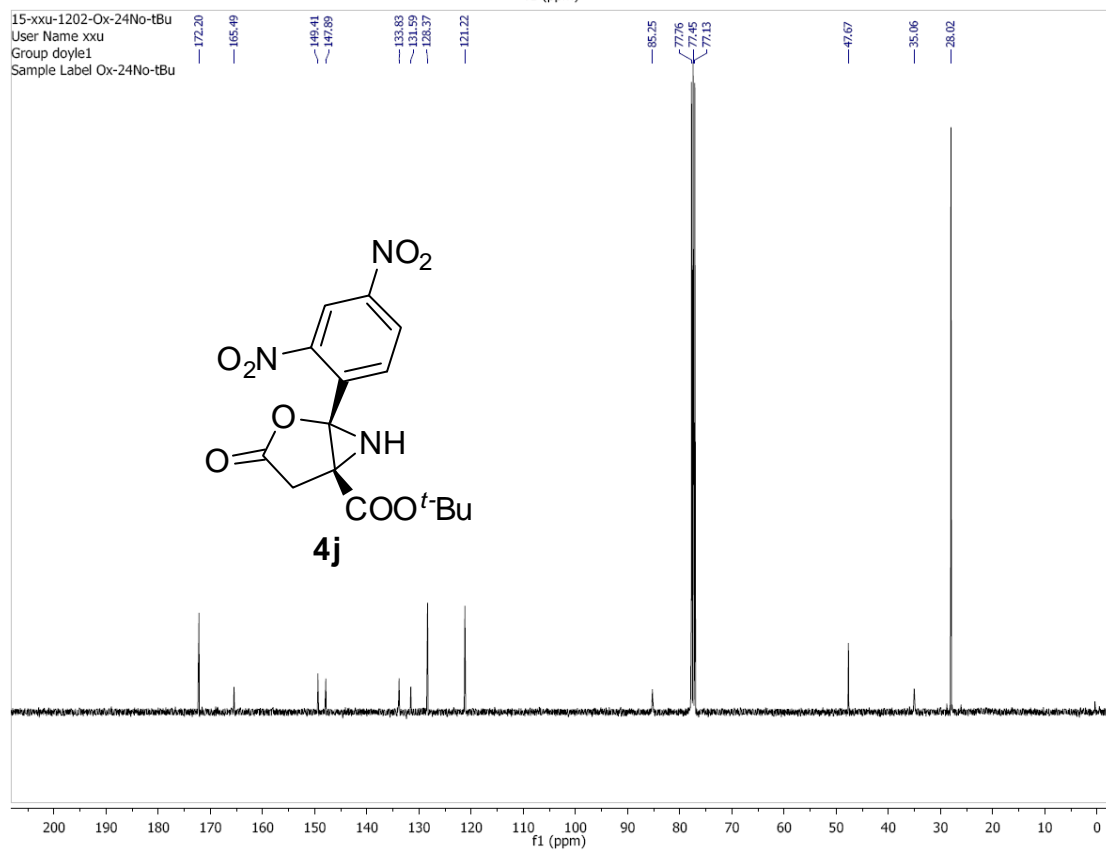

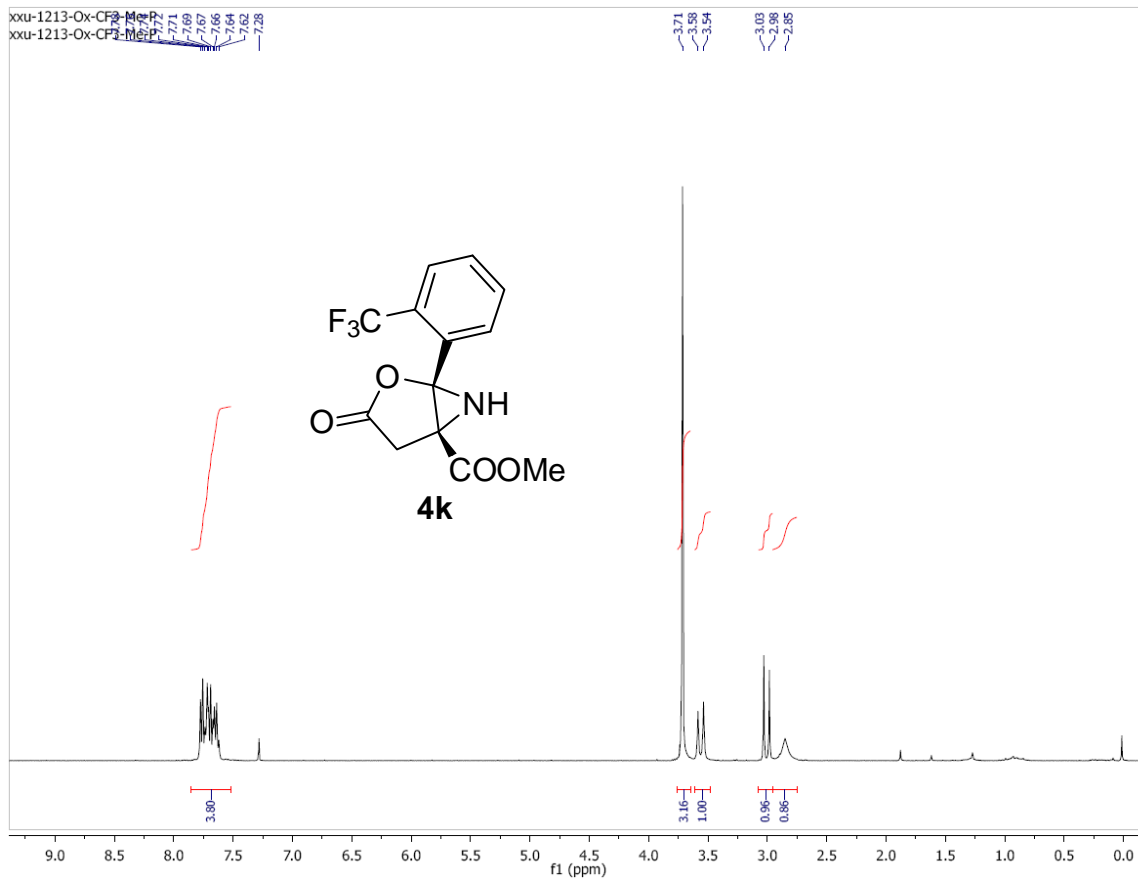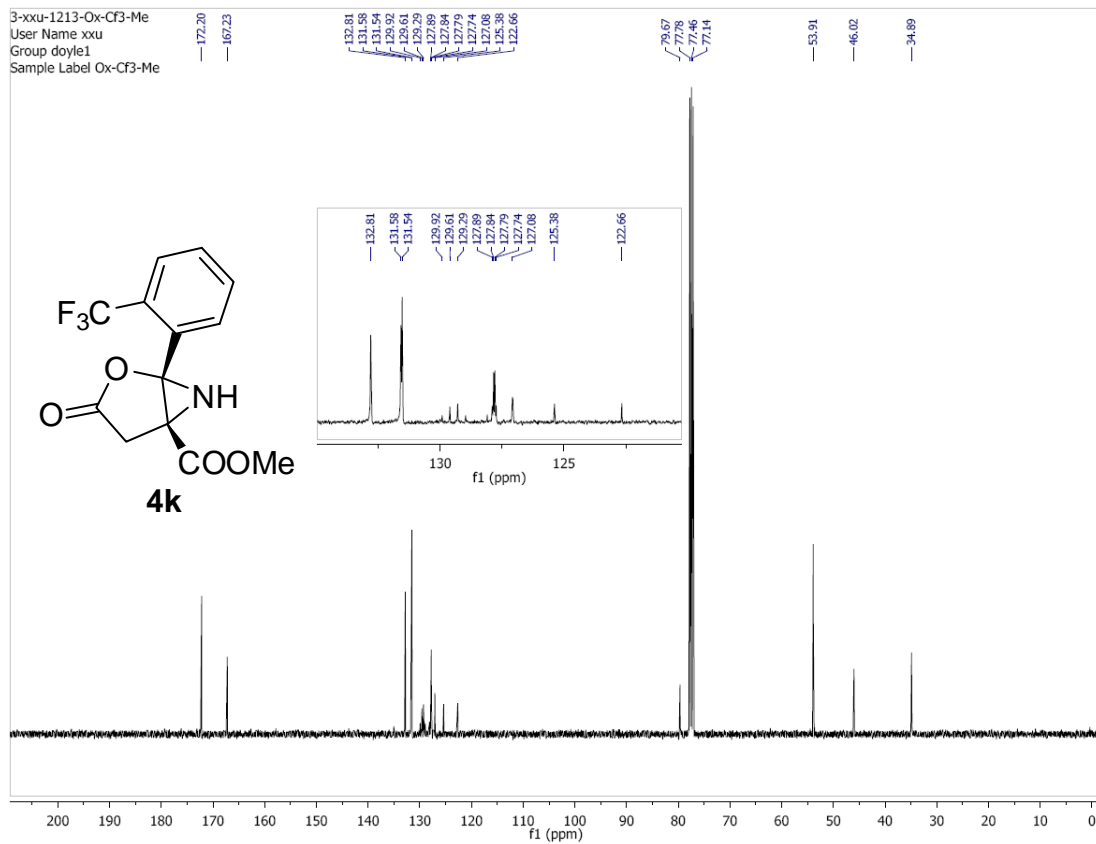



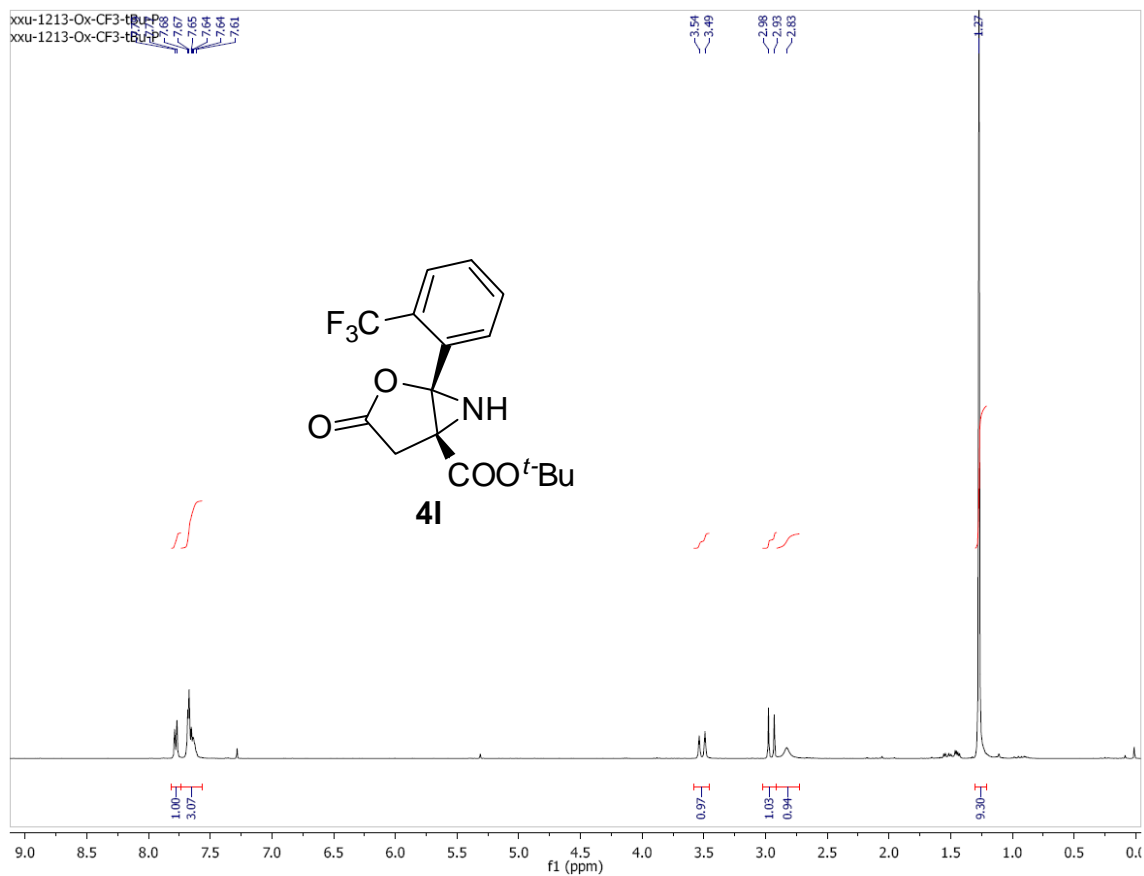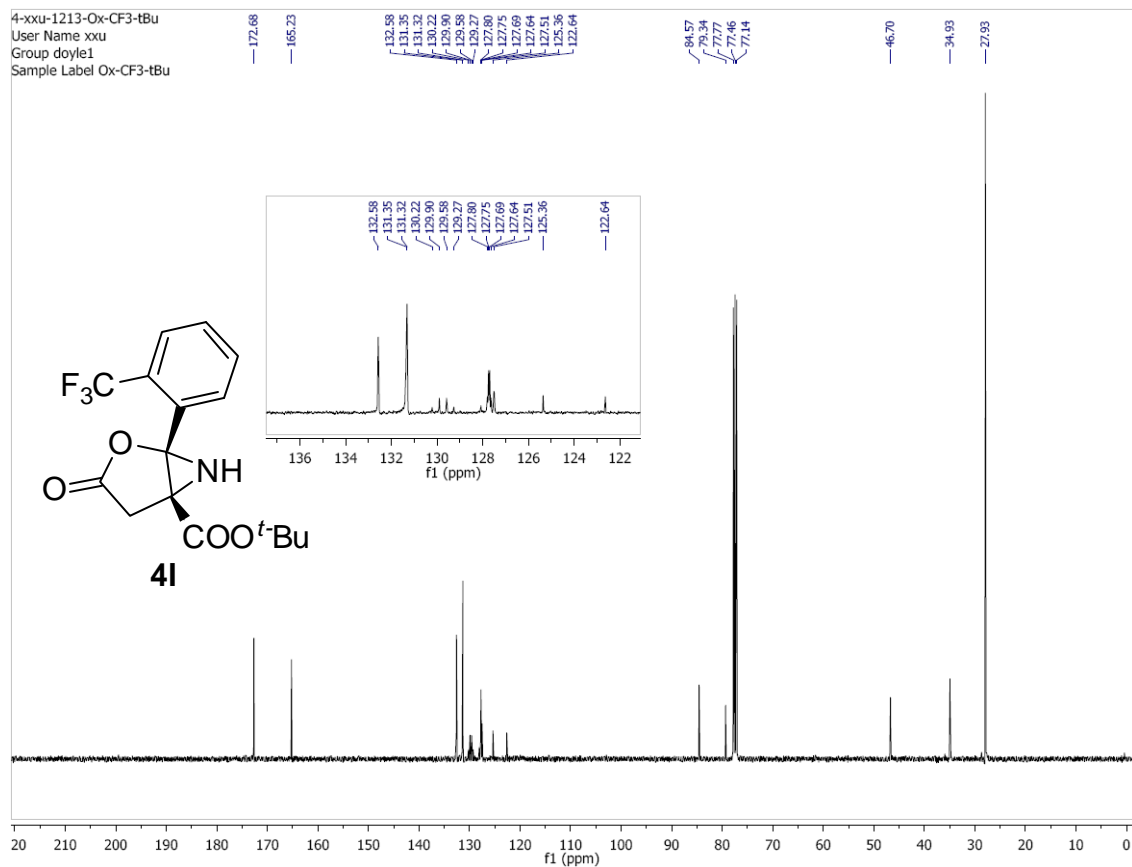

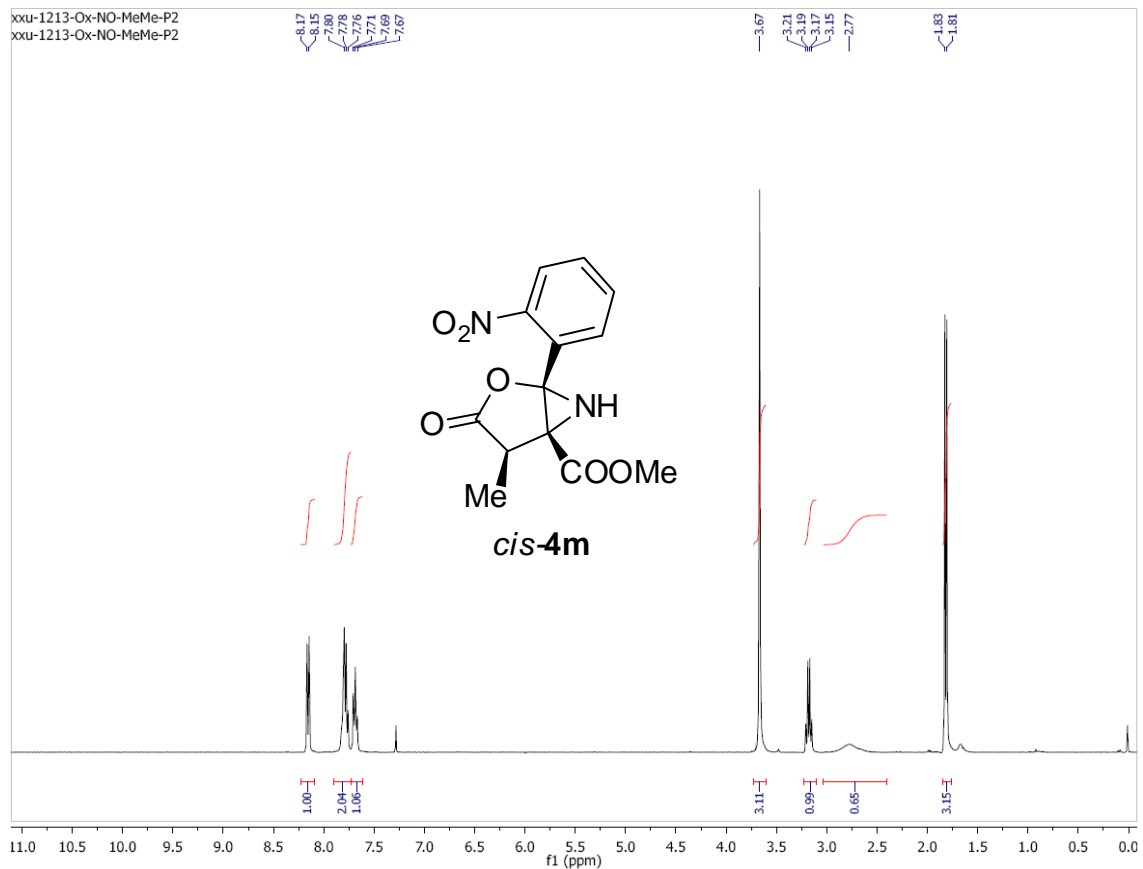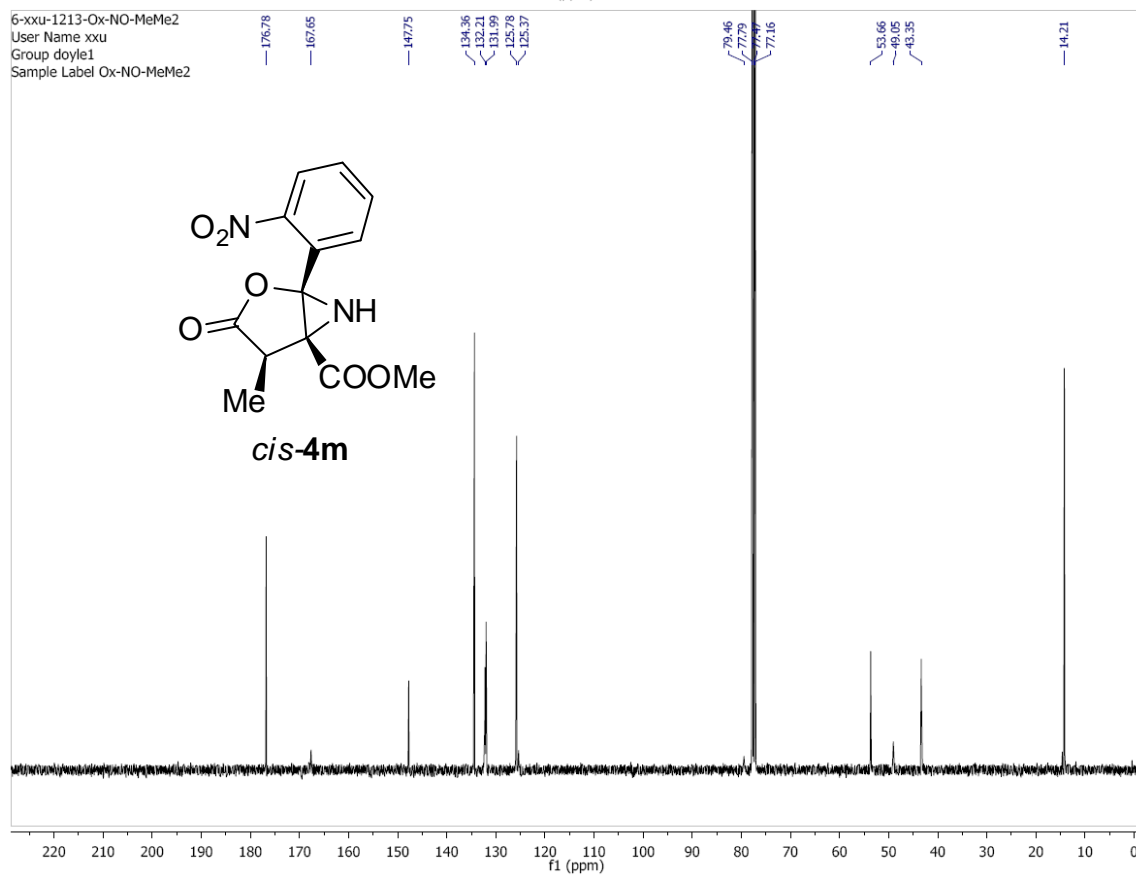

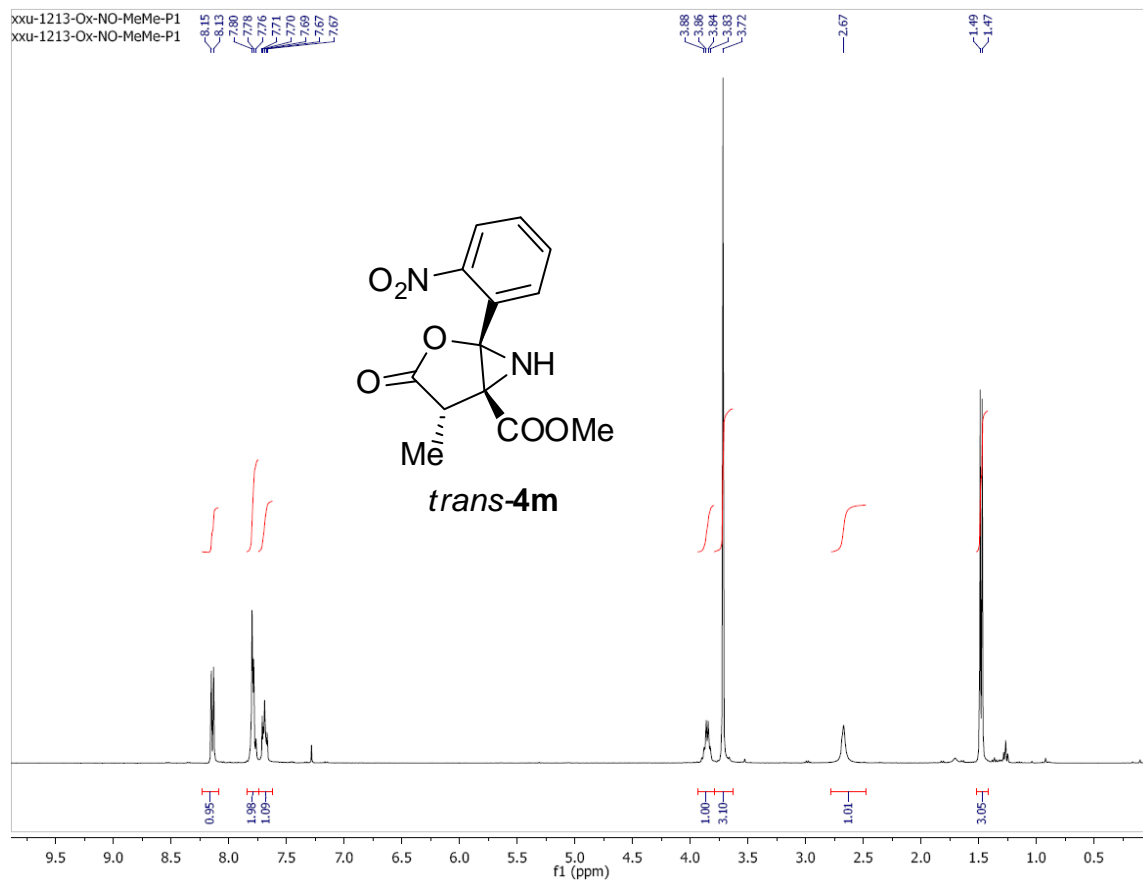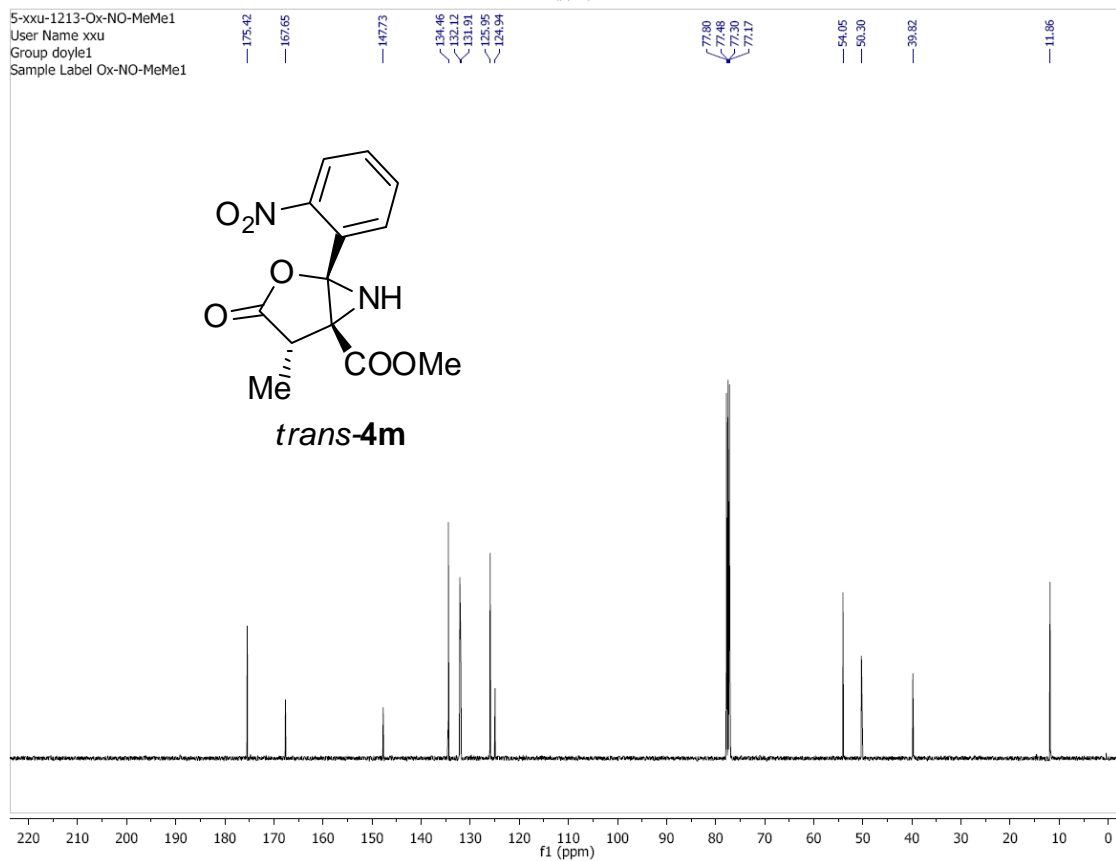

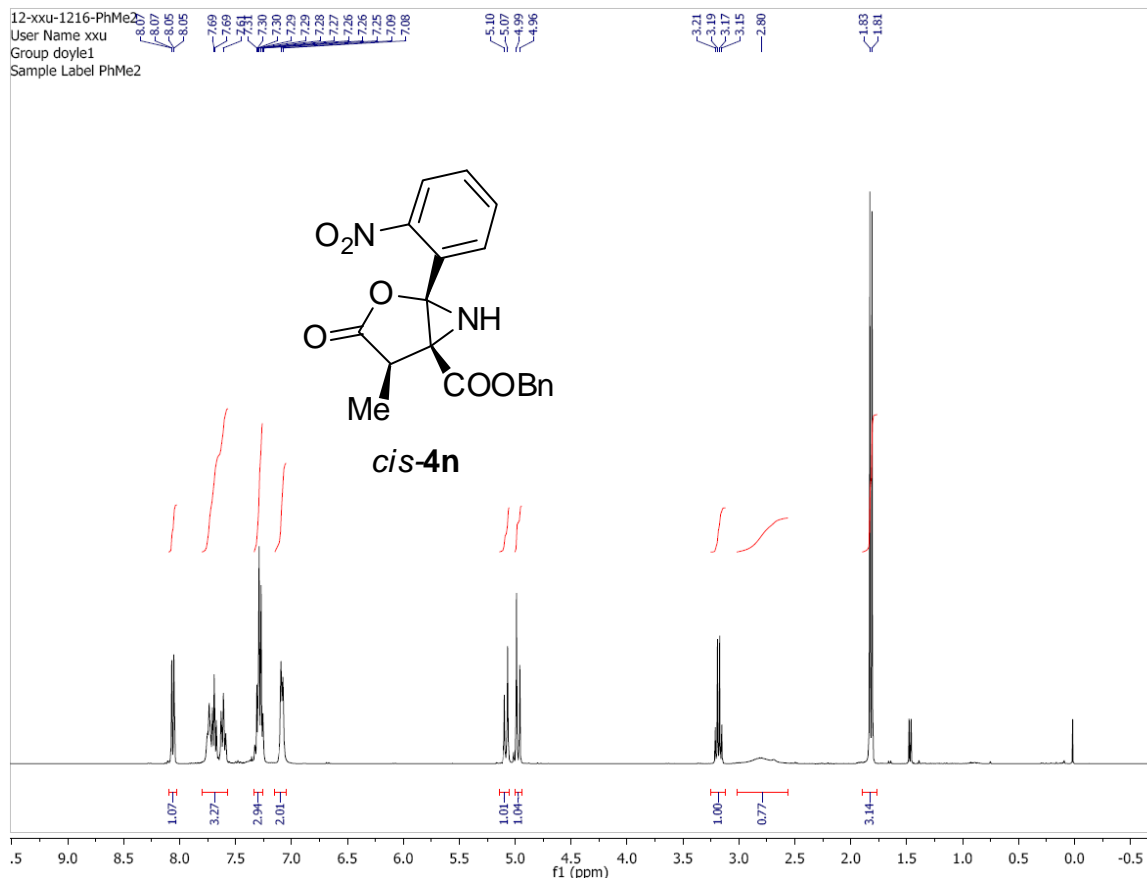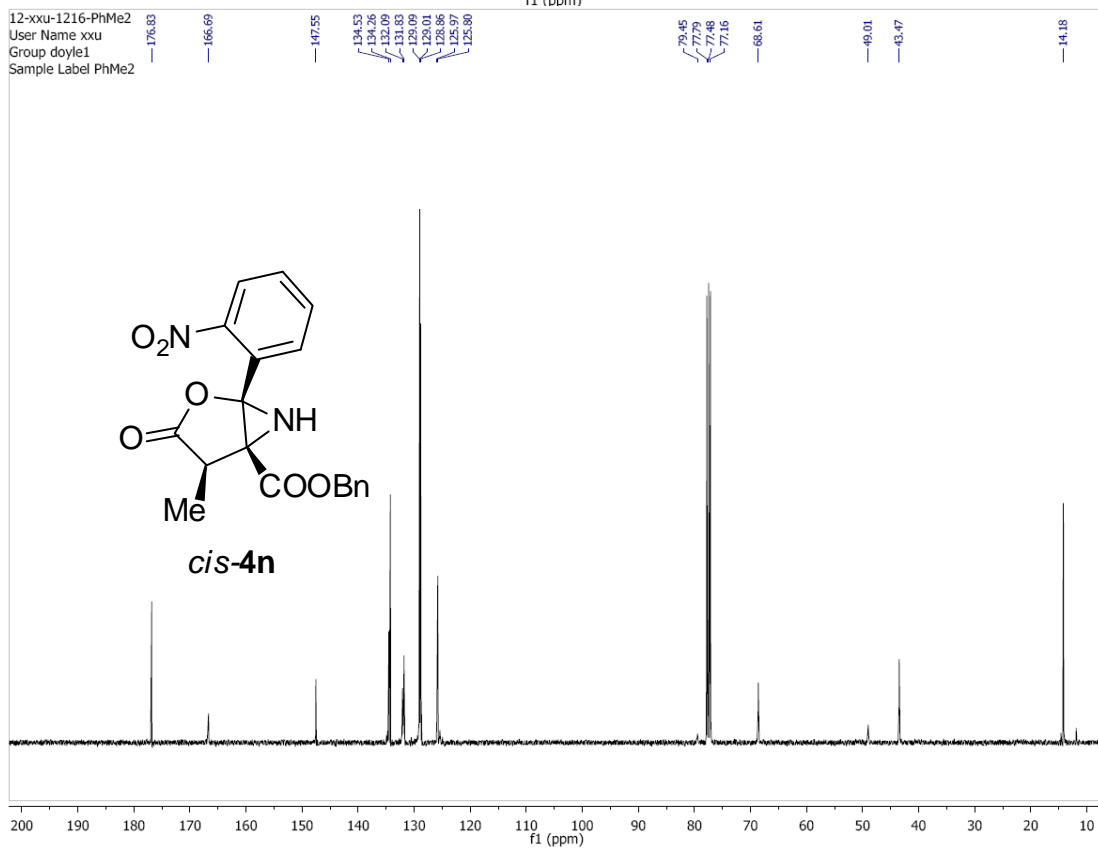

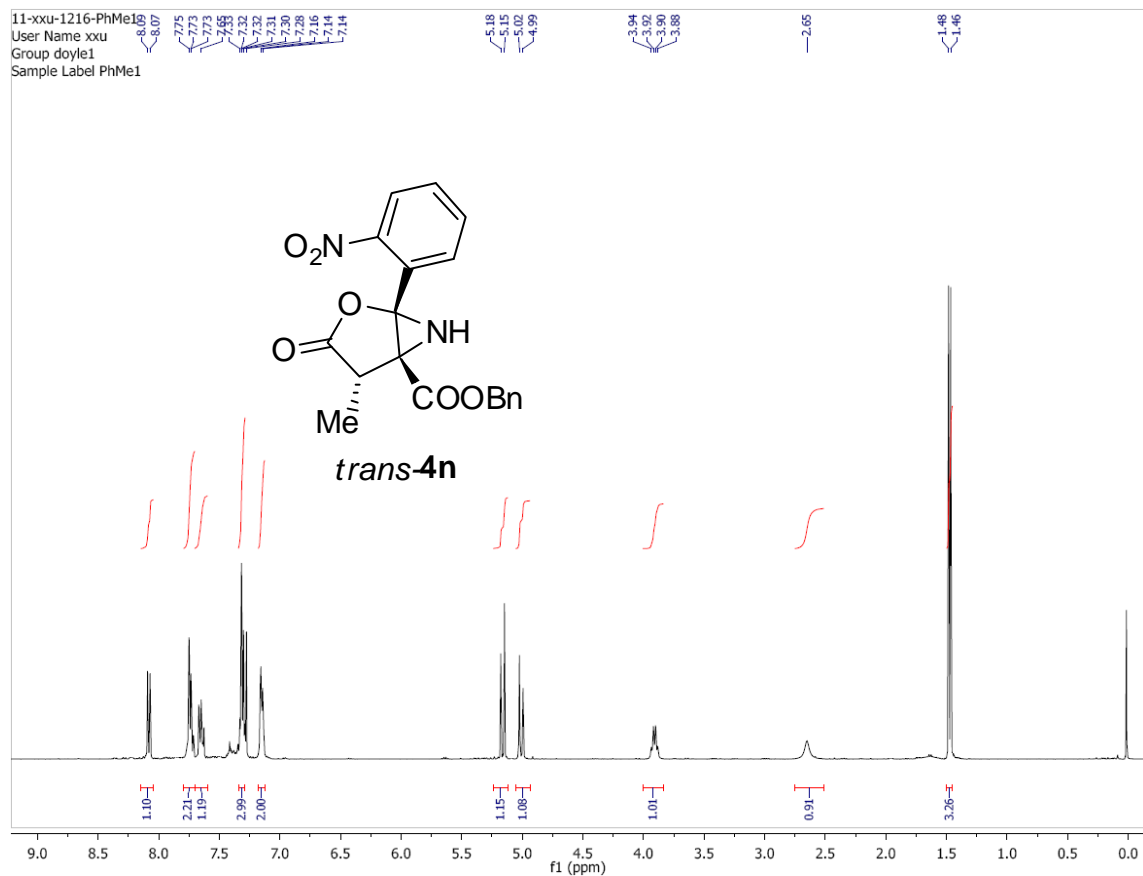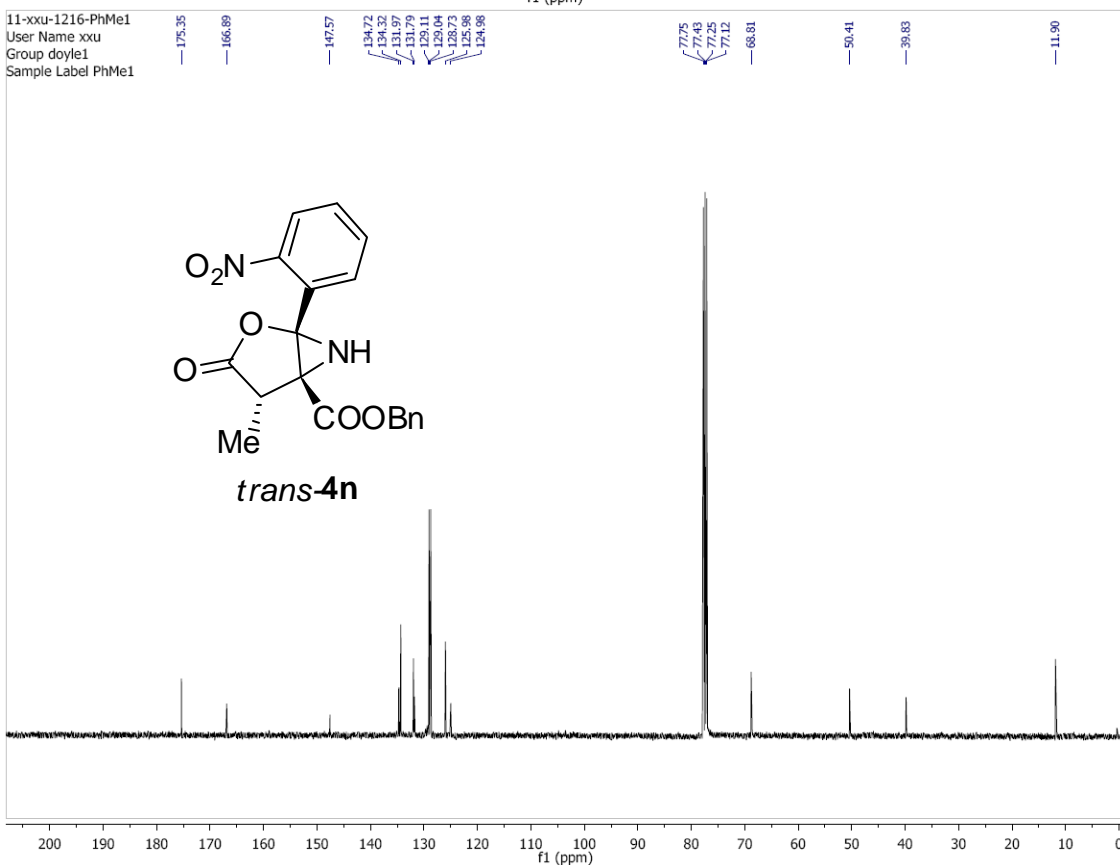

13-xxu-12160-BnMe1  
User Name xxu  
Group doyle1  
Sample Label BnMe1

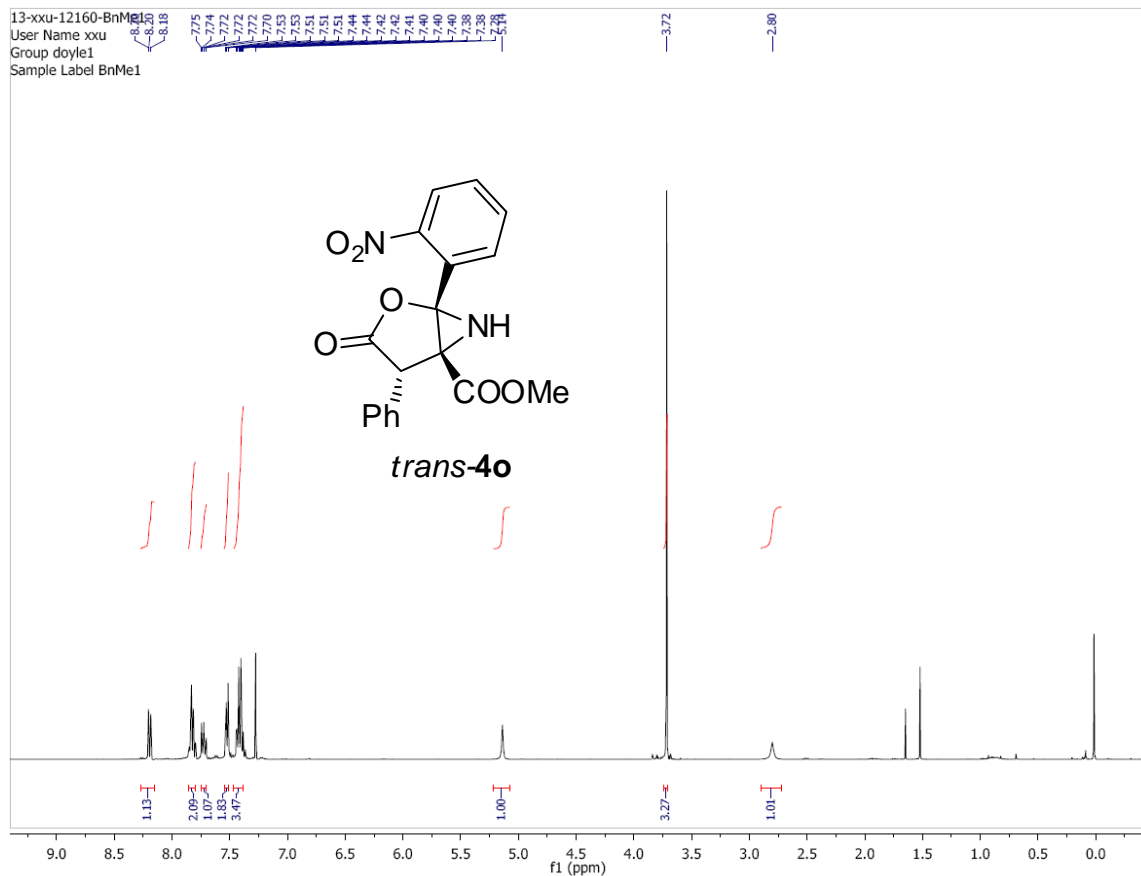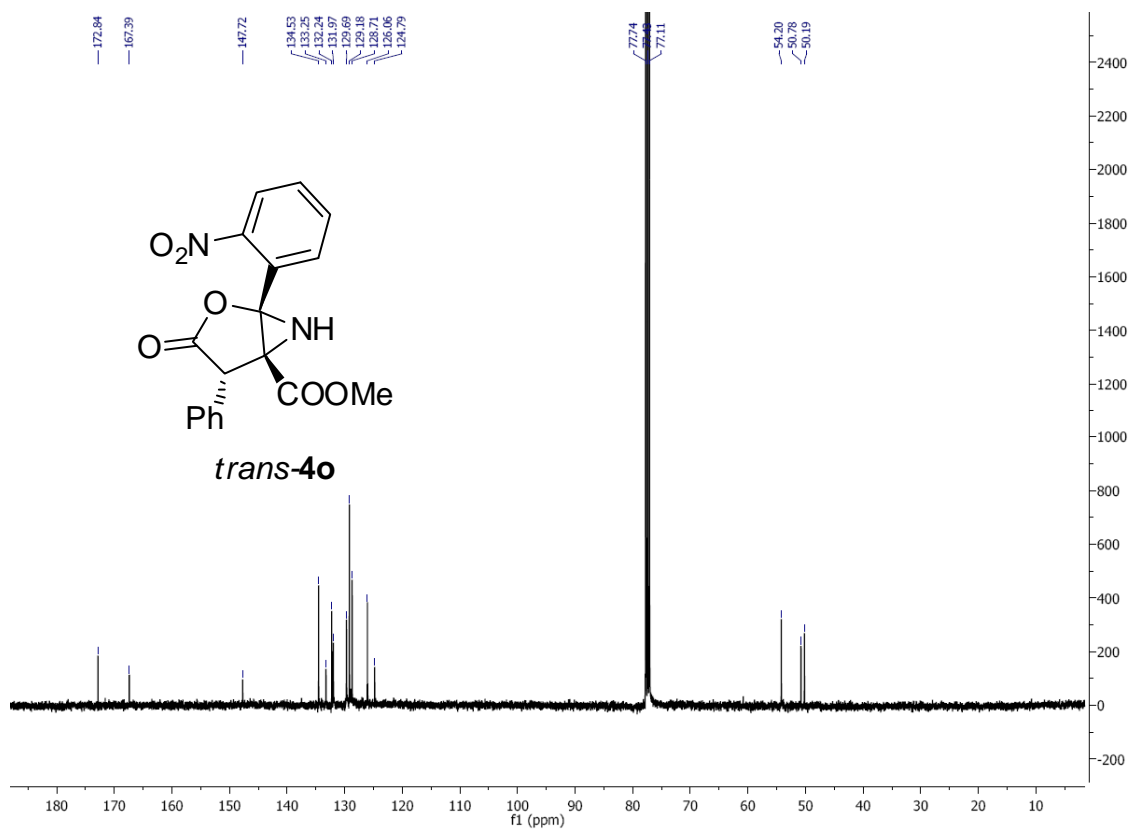

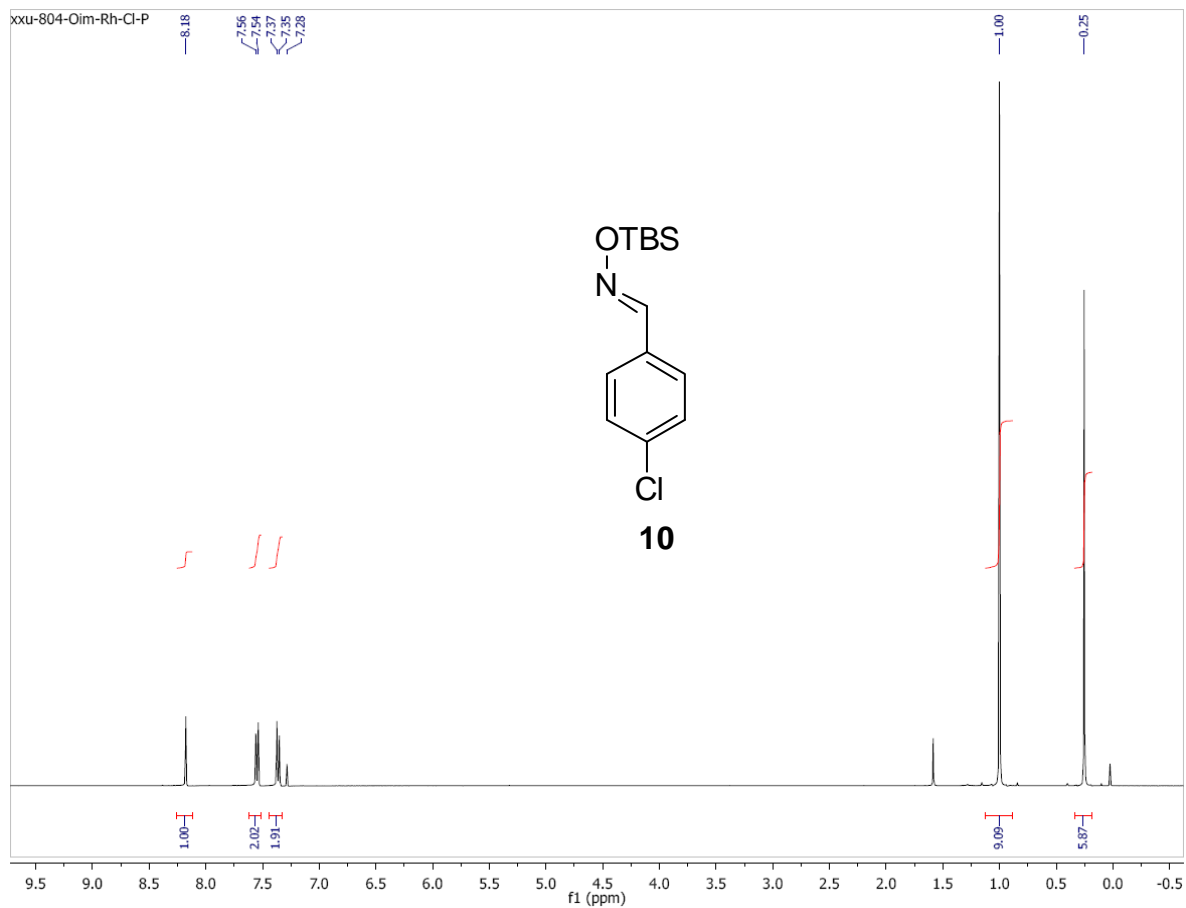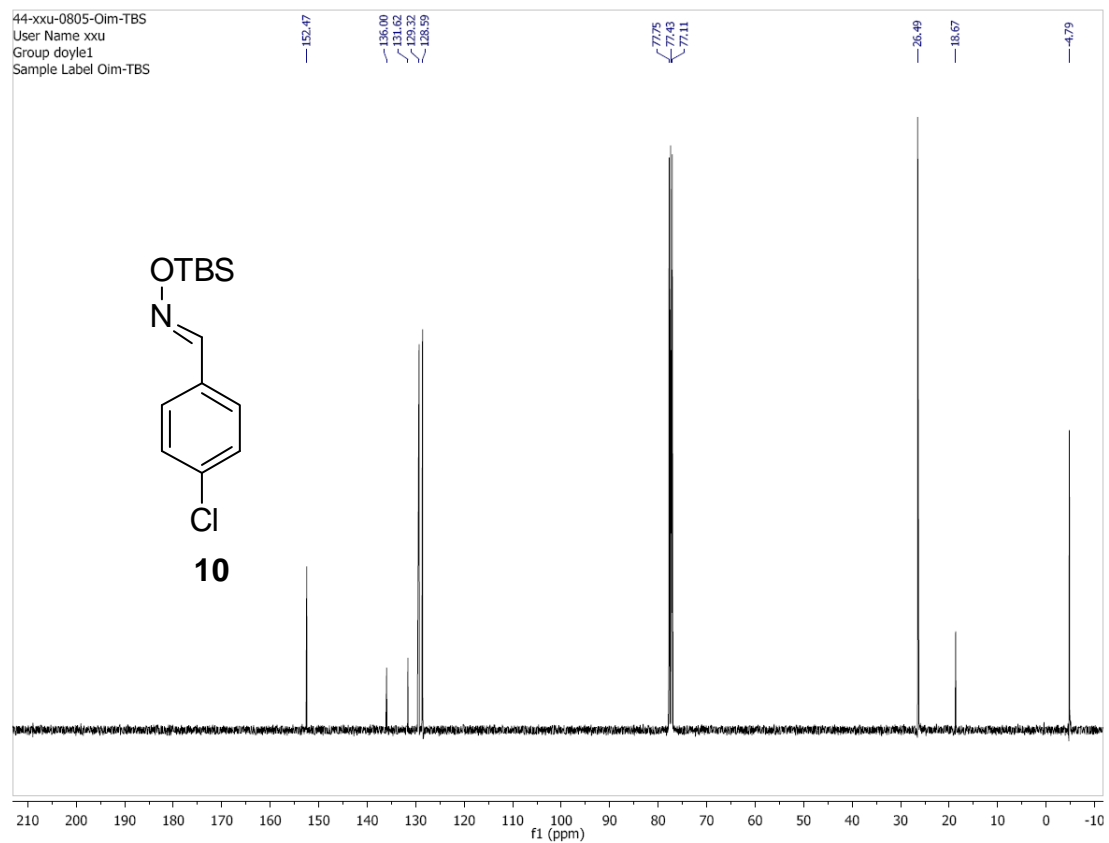

Supplement: NIHMS382693-supplement-1_si_001.pdf [file NIHMS382693-supplement-1_si_001.pdf]
